# Supplementary material for: PATZ1 fusions define a novel molecularly distinct neuroepithelial tumor entity with a broad histological spectrum
Source: Acta Neuropathol. 2021 Aug 21;142(5):841–57. doi: 10.1007/s00401-021-02354-8 (PMC8500868; doi:10.1007/s00401-021-02354-8)
Supplement: Supplementary file 5 — Supplementary file5. Supplementary Fig. 3 Expression of particular differentiation/proliferation markers: GFAP, MAP2, CD99, Desmin (DES) NeuN (RBFOX3): low, OLIG2 and Synaptophysin (SYP): modest. MKI67 levels were higher than in PA, but lower than the GBM subgroups (similar to PXA). Gene expression is shown as TPM (transcripts per kilobase million). H3.3 G34R, glioblastoma, IDH wildtype, H3.3 G34 mutant; H3.3 K27M, diffuse midline glioma H3 K27M mutant: pedGBM_MYCN, glioblastoma, IDH wildtype, subclass MYCN; pedRTKI, glioblastoma, IDH wildtype, subclass RTK I; pedRTKII, glioblastoma, IDH wildtype, subclass RTK II; PXA pleomorphic xanthoastrocytoma; PA_BRAF_Fus pilocytic astrocytoma with BRAF fusion (TIF 14413 kb) [file 401_2021_2354_MOESM5_ESM.xlsx]

## Sheet: GEP_PATZ1
Ensembl ID	Gene Symbol	Corrected p-value	Fold-change	Direction_in_PATZ1
ENSG00000129965.9	INS-IGF2	1.02133e-58	20.6695	UP
ENSG00000272255.1	CTD-3224K15.3	3.25765e-56	5.04574	UP
ENSG00000186081.7	KRT5	3.61021e-53	15.8122	UP
ENSG00000075891.17	PAX2	2.50419e-52	19.6149	UP
ENSG00000243758.1	RPL35AP15	3.02302e-52	41.4641	UP
ENSG00000250635.1	CTD-3224K15.2	2.22331e-49	5.16167	UP
ENSG00000130595.12	TNNT3	3.36942e-40	9.608	UP
ENSG00000167105.3	TMEM92	3.86789e-39	6.54885	UP
ENSG00000216740.2	ANXA2P3	8.85072e-38	13.558	UP
ENSG00000248491.1	RP11-125O18.1	1.52546e-37	13.1747	UP
ENSG00000124343.8	XG	1.58895e-37	9.0257	UP
ENSG00000188686.2	SCXA	3.77558e-37	19.1261	UP
ENSG00000185087.7	FAM169B	1.64043e-36	28.0355	UP
ENSG00000230928.1	RP11-34A14.3	1.5136e-35	7.87098	UP
ENSG00000185231.4	MC2R	1.49261e-34	51.6672	UP
ENSG00000179348.7	GATA2	3.39823e-34	3.01037	UP
ENSG00000160951.3	PTGER1	3.40434e-34	4.93406	UP
ENSG00000138131.3	LOXL4	3.4053e-34	3.32784	UP
ENSG00000124749.12	COL21A1	4.12227e-34	4.85582	UP
ENSG00000122145.10	TBX22	1.82575e-33	20.4227	UP
ENSG00000258969.1	RP11-305B6.3	1.90266e-33	17.5192	UP
ENSG00000122420.5	PTGFR	2.01093e-33	6.13846	UP
ENSG00000131196.13	NFATC1	4.85345e-33	2.23129	UP
ENSG00000130598.11	TNNI2	5.39158e-33	3.26308	UP
ENSG00000187786.1	SCXB	6.90589e-33	26.9636	UP
ENSG00000248663.2	LINC00992	1.027e-32	12.267	UP
ENSG00000052850.5	ALX4	9.91619e-32	5.56474	UP
ENSG00000178457.3	LINC00314	1.25187e-31	17.206	UP
ENSG00000226051.2	ZNF503-AS1	5.70236e-31	6.55857	UP
ENSG00000158815.6	FGF17	1.10493e-30	4.04802	UP
ENSG00000250945.1	RP11-810P8.1	1.25875e-30	26.5869	UP
ENSG00000236658.1	RP11-83J21.3	4.02616e-30	10.9962	UP
ENSG00000145113.17	MUC4	2.11006e-29	7.56401	UP
ENSG00000256391.1	SDIM1	2.74963e-29	20.5546	UP
ENSG00000264954.1	RP11-214C8.2	9.36829e-29	10.4181	UP
ENSG00000261193.1	RP11-863P13.5	1.27185e-28	6.79203	UP
ENSG00000125965.4	GDF5	2.99093e-28	5.37024	UP
ENSG00000244300.2	RP11-475N22.4	4.11949e-28	3.63216	UP
ENSG00000232193.1	AL157359.4	4.49952e-28	61.1512	UP
ENSG00000099869.6	IGF2-AS	4.65511e-28	6.74407	UP
ENSG00000006016.6	CRLF1	6.42904e-28	3.87355	UP
ENSG00000188076.2	SCGB1C1	2.14347e-27	6.60189	UP
ENSG00000164120.9	HPGD	3.34721e-27	5.31973	UP
ENSG00000249051.2	RP11-447E20.1	3.8247e-27	146.069	UP
ENSG00000250596.1	RP11-440I14.2	6.45017e-27	51.7859	UP
ENSG00000248869.1	RP11-138I17.1	1.36997e-26	16.2338	UP
ENSG00000149043.12	SYT8	1.39895e-26	9.48812	UP
ENSG00000207805.1	MIR483	1.72656e-26	8.69639	UP
ENSG00000229373.4	LINC00452	3.09718e-26	6.26285	UP
ENSG00000223414.2	LINC00473	3.21192e-26	7.31473	UP
ENSG00000174482.6	LINGO2	3.81214e-26	7.64815	UP
ENSG00000238034.1	RP5-1185K9.1	6.48725e-26	47.393	UP
ENSG00000249526.1	CTB-35F21.1	1.01487e-25	2.77897	UP
ENSG00000225530.1	SP3P	1.10575e-25	36.7039	UP
ENSG00000203335.4	AC006019.3	1.37072e-25	18.9367	UP
ENSG00000187151.3	ANGPTL5	3.49621e-25	6.49087	UP
ENSG00000232252.1	RP11-30L8.1	3.75825e-25	124.538	UP
ENSG00000180066.5	C10ORF91	3.88946e-25	21.1721	UP
ENSG00000156427.7	FGF18	5.40759e-25	5.38399	UP
ENSG00000258913.1	RP11-260M19.2	7.13882e-25	10.0567	UP
ENSG00000161992.5	C16ORF11	8.01759e-25	14.5062	UP
ENSG00000228032.1	C14ORF144	8.39835e-25	10.4618	UP
ENSG00000139648.6	KRT71	1.08985e-24	11.8676	UP
ENSG00000225289.1	RPL29P29	1.36254e-24	126.587	UP
ENSG00000227512.1	RP11-413M3.4	2.38974e-24	2.90861	UP
ENSG00000184601.6	C14ORF180	2.50198e-24	11.8462	UP
ENSG00000260412.1	RP11-438B23.2	4.19307e-24	10.3531	UP
ENSG00000165905.12	GYLTL1B	4.5904e-24	5.93043	UP
ENSG00000230571.2	CTD-2533K21.3	4.6472e-24	33.7334	UP
ENSG00000007314.7	SCN4A	6.04555e-24	6.98184	UP
ENSG00000213145.5	CRIP1	2.1207e-23	3.42928	UP
ENSG00000233900.1	RPL17P35	2.59944e-23	11.293	UP
ENSG00000234311.1	RP11-432J24.3	2.61314e-23	9.76282	UP
ENSG00000225667.1	LINC00505	6.629e-23	5.71747	UP
ENSG00000166482.7	MFAP4	7.6268e-23	2.09498	UP
ENSG00000263489.1	CTC-264K15.6	8.97143e-23	9.08415	UP
ENSG00000205037.2	RP11-863P13.4	1.73624e-22	6.57208	UP
ENSG00000265403.1	AC015884.1	4.16825e-22	3.27013	UP
ENSG00000239405.1	TMED10P2	5.89234e-22	5.68082	UP
ENSG00000248426.1	CTD-2533K21.2	6.4031e-22	29.637	UP
ENSG00000197406.6	DIO3	1.23399e-21	4.60482	UP
ENSG00000236627.1	RP11-252P19.1	1.37487e-21	21.7394	UP
ENSG00000261567.1	RP11-680G10.1	1.38936e-21	4.13444	UP
ENSG00000182950.2	ODF3L1	1.86979e-21	2.88165	UP
ENSG00000213450.4	VDAC1P7	1.97555e-21	53.0985	UP
ENSG00000251584.1	RP11-440I14.3	2.35616e-21	39.1543	UP
ENSG00000241449.1	RP11-545G3.1	2.92913e-21	7.55969	UP
ENSG00000162344.3	FGF19	4.07134e-21	19.8317	UP
ENSG00000124568.6	SLC17A1	6.19953e-21	9.47494	UP
ENSG00000129910.3	CDH15	6.24043e-21	5.96162	UP
ENSG00000227036.2	LINC00511	6.87111e-21	-3.05279	DOWN
ENSG00000169583.12	CLIC3	9.47634e-21	3.18463	UP
ENSG00000251258.1	RFPL4B	1.10149e-20	9.85356	UP
ENSG00000249131.1	CTB-35F21.2	1.50821e-20	4.13416	UP
ENSG00000260089.2	ADAM3B	1.59057e-20	11.3077	UP
ENSG00000113924.7	HGD	1.67946e-20	5.39539	UP
ENSG00000253657.1	RP11-25P11.2	1.79058e-20	26.1303	UP
ENSG00000235505.3	RP11-693N9.2	3.0739e-20	3.11465	UP
ENSG00000262601.1	CTC-786C10.1	3.51318e-20	3.67336	UP
ENSG00000250252.1	RP11-342A1.1	5.05514e-20	13.2609	UP
ENSG00000260910.1	LINC00565	5.83732e-20	2.87615	UP
ENSG00000123612.11	ACVR1C	5.96285e-20	5.41694	UP
ENSG00000167244.13	IGF2	6.5174e-20	2.59478	UP
ENSG00000184564.8	SLITRK6	7.65808e-20	5.00706	UP
ENSG00000236190.1	RP3-431C21.1	9.2415e-20	93.8776	UP
ENSG00000162643.8	WDR63	1.10896e-19	4.33729	UP
ENSG00000259828.1	RP11-63E9.1	1.78488e-19	11.2745	UP
ENSG00000185149.5	NPY2R	1.81972e-19	6.91845	UP
ENSG00000232487.1	RASA3-IT1	1.92058e-19	4.16437	UP
ENSG00000264232.1	RP11-453M23.1	2.15341e-19	14.8884	UP
ENSG00000102935.7	ZNF423	2.47429e-19	1.93096	UP
ENSG00000258748.1	CTD-2223O18.1	2.81356e-19	5.85038	UP
ENSG00000109851.5	DBX1	2.919e-19	10.3755	UP
ENSG00000223838.1	AC007091.1	3.70198e-19	7.67681	UP
ENSG00000105954.2	NPVF	6.98294e-19	10.9519	UP
ENSG00000253836.1	RP11-731N10.1	8.40731e-19	50.4275	UP
ENSG00000135226.12	UGT2B28	8.71478e-19	11.1252	UP
ENSG00000185269.7	NOTUM	1.15344e-18	4.33396	UP
ENSG00000237412.2	PRSS56	1.33041e-18	10.1552	UP
ENSG00000257542.4	OR7E47P	1.96315e-18	14.3494	UP
ENSG00000163873.5	GRIK3	4.73723e-18	-3.87018	DOWN
ENSG00000225478.2	RP1-8B22.2	4.76837e-18	266.372	UP
ENSG00000251387.1	CTB-35F21.3	5.86357e-18	3.70709	UP
ENSG00000231019.1	RP11-545P6.2	6.65096e-18	51.5267	UP
ENSG00000009709.7	PAX7	6.89156e-18	11.6082	UP
ENSG00000133067.13	LGR6	1.16244e-17	4.43789	UP
ENSG00000167748.6	KLK1	1.28614e-17	8.67335	UP
ENSG00000250538.1	RP11-92A5.2	1.29196e-17	6.57313	UP
ENSG00000173673.7	HES3	1.5022e-17	10.8941	UP
ENSG00000196576.10	PLXNB2	1.60007e-17	1.34189	UP
ENSG00000130720.8	FIBCD1	1.73076e-17	2.88958	UP
ENSG00000249484.4	AC091969.1	2.9389e-17	11.5586	UP
ENSG00000116014.5	KISS1R	2.94146e-17	6.13606	UP
ENSG00000261888.1	AC144831.1	3.3737e-17	2.71226	UP
ENSG00000223502.1	RP11-96B5.3	3.54766e-17	5.40344	UP
ENSG00000123572.12	NRK	3.63989e-17	8.23981	UP
ENSG00000263635.1	RP11-805F19.2	3.85555e-17	13.7758	UP
ENSG00000250997.1	RP11-502M1.1	4.42323e-17	11.2901	UP
ENSG00000172296.8	SPTLC3	4.75246e-17	2.46998	UP
ENSG00000228951.1	RP11-336A10.4	1.03291e-16	22.2963	UP
ENSG00000185989.9	RASA3	1.22118e-16	1.37191	UP
ENSG00000143196.4	DPT	1.30183e-16	6.50687	UP
ENSG00000242902.1	RP11-309L24.2	1.3801e-16	3.83794	UP
ENSG00000135902.5	CHRND	1.61357e-16	8.79459	UP
ENSG00000237941.2	KCNQ1DN	1.80879e-16	4.43773	UP
ENSG00000241956.5	CTC-340A15.2	2.27493e-16	9.5816	UP
ENSG00000227121.1	RP11-319F12.2	2.4152e-16	129.001	UP
ENSG00000034053.10	APBA2	3.16352e-16	-1.62469	DOWN
ENSG00000143851.11	PTPN7	3.20014e-16	2.1902	UP
ENSG00000075340.18	ADD2	3.706e-16	-2.56906	DOWN
ENSG00000131149.13	GSE1	3.75503e-16	1.66731	UP
ENSG00000271053.1	RP11-97F8.1	4.0862e-16	13.366	UP
ENSG00000179300.3	ZCCHC5	4.30612e-16	9.35345	UP
ENSG00000251216.1	RP11-161D15.3	4.74421e-16	30.9264	UP
ENSG00000213512.1	GBP7	5.23083e-16	3.66607	UP
ENSG00000234083.1	AJ006995.3	5.79622e-16	21.0063	UP
ENSG00000214347.5	CTB-180A7.8	6.16576e-16	4.03886	UP
ENSG00000258115.1	RP11-89M22.3	6.17599e-16	23.1189	UP
ENSG00000244681.1	MTHFD2P1	6.80898e-16	7.62442	UP
ENSG00000177984.6	LCN15	6.94566e-16	9.59181	UP
ENSG00000100417.7	PMM1	1.33614e-15	-1.30517	DOWN
ENSG00000252196.1	AL590482.1	1.3805e-15	19.262	UP
ENSG00000260506.1	RP11-648F7.1	1.46933e-15	8.92926	UP
ENSG00000064195.7	DLX3	1.71841e-15	7.00116	UP
ENSG00000228430.4	RP11-15B24.5	2.36827e-15	6.06919	UP
ENSG00000126705.9	AHDC1	3.17861e-15	1.44185	UP
ENSG00000240298.2	RPL36AP40	3.18947e-15	16.2062	UP
ENSG00000263684.1	RP11-628O18.1	3.38992e-15	5.73918	UP
ENSG00000066735.10	KIF26A	3.96272e-15	2.57002	UP
ENSG00000229414.2	KCNQ1-AS1	4.54635e-15	4.45553	UP
ENSG00000197641.7	SERPINB13	4.56651e-15	10.3535	UP
ENSG00000270077.1	KB-1958F4.1	4.61257e-15	4.27171	UP
ENSG00000186895.2	FGF3	4.69239e-15	9.03304	UP
ENSG00000254041.1	RP11-574O7.1	5.31769e-15	5.28722	UP
ENSG00000100105.13	PATZ1	5.64707e-15	1.33101	UP
ENSG00000267156.1	TPMTP1	5.80738e-15	6.74173	UP
ENSG00000113722.12	CDX1	7.00672e-15	6.44509	UP
ENSG00000224383.3	C17ORF72	7.04136e-15	2.66479	UP
ENSG00000171201.6	SMR3B	9.41767e-15	90.7326	UP
ENSG00000111339.6	ART4	9.94657e-15	5.03174	UP
ENSG00000223942.1	RP11-252P19.2	1.06737e-14	68.3444	UP
ENSG00000171794.3	UTF1	1.15081e-14	9.53438	UP
ENSG00000226674.4	TEX41	1.15893e-14	5.44749	UP
ENSG00000174498.9	IGDCC3	1.22607e-14	2.29336	UP
ENSG00000205978.5	NYNRIN	1.48996e-14	1.68514	UP
ENSG00000260166.1	RP11-863P13.6	1.85578e-14	5.1659	UP
ENSG00000271077.1	AC096553.5	2.43346e-14	18.1431	UP
ENSG00000231173.1	AC116609.3	4.0173e-14	6.46248	UP
ENSG00000171551.7	ECEL1	4.18021e-14	4.61669	UP
ENSG00000236301.4	MRGPRG-AS1	4.98017e-14	13.1878	UP
ENSG00000118491.7	ZC2HC1B	4.99327e-14	3.22367	UP
ENSG00000146151.8	HMGCLL1	5.55427e-14	3.41656	UP
ENSG00000228401.3	RP11-251M1.1	6.93303e-14	2.88132	UP
ENSG00000159842.10	ABR	7.34925e-14	1.27311	UP
ENSG00000197859.5	ADAMTSL2	7.3669e-14	1.74189	UP
ENSG00000232821.1	AC003986.6	7.5934e-14	6.66224	UP
ENSG00000250723.1	RP11-79E3.2	8.66113e-14	24.4991	UP
ENSG00000171604.7	CXXC5	9.64068e-14	1.21779	UP
ENSG00000176490.4	DIRAS1	1.23838e-13	-1.7557	DOWN
ENSG00000250708.1	RP11-161D15.1	1.24106e-13	16.8473	UP
ENSG00000254231.1	CTD-2284J15.1	1.37104e-13	2.62707	UP
ENSG00000236030.1	LINC01036	1.42816e-13	5.66245	UP
ENSG00000128591.11	FLNC	1.51606e-13	1.85516	UP
ENSG00000224932.1	AC107399.2	1.51724e-13	22.5173	UP
ENSG00000160963.9	COL26A1	1.62053e-13	2.96942	UP
ENSG00000251473.2	AC004069.1	1.71577e-13	11.3216	UP
ENSG00000130812.6	ANGPTL6	1.79353e-13	2.20694	UP
ENSG00000268231.1	CTD-2560K21.6	2.26226e-13	2.74676	UP
ENSG00000139055.2	ERP27	2.33231e-13	2.60803	UP
ENSG00000154736.5	ADAMTS5	2.39036e-13	2.55953	UP
ENSG00000216624.2	GAPDHP72	2.47369e-13	5.13029	UP
ENSG00000166183.11	ASPG	2.60043e-13	4.53706	UP
ENSG00000254656.1	RTL1	2.84063e-13	5.05771	UP
ENSG00000187616.4	TMEM8C	2.84239e-13	8.03106	UP
ENSG00000164220.6	F2RL2	3.06395e-13	2.88627	UP
ENSG00000254303.1	RP11-398G24.2	3.19445e-13	9.98336	UP
ENSG00000251085.1	RP11-893F2.6	3.43781e-13	7.5741	UP
ENSG00000223573.2	TINCR	3.44065e-13	2.62855	UP
ENSG00000170004.12	CHD3	3.92364e-13	1.36608	UP
ENSG00000184682.5	C11ORF89	3.93911e-13	3.0191	UP
ENSG00000179954.10	SSC5D	4.05747e-13	2.09431	UP
ENSG00000233608.2	TWIST2	4.6747e-13	3.59047	UP
ENSG00000172889.11	EGFL7	4.83272e-13	1.45295	UP
ENSG00000262133.1	RP11-676J12.6	5.07706e-13	6.1266	UP
ENSG00000124564.13	SLC17A3	5.33263e-13	6.94295	UP
ENSG00000224574.1	COL18A1-AS2	5.35472e-13	6.43015	UP
ENSG00000160209.14	PDXK	5.49699e-13	1.27749	UP
ENSG00000197320.4	AC060834.2	5.87129e-13	12.1916	UP
ENSG00000228685.1	RP11-336A10.7	5.9146e-13	16.6353	UP
ENSG00000233554.1	RP11-326F20.5	7.56952e-13	2.17338	UP
ENSG00000205018.2	RP11-830F9.6	7.81079e-13	3.61307	UP
ENSG00000160111.8	CPAMD8	8.02793e-13	3.51148	UP
ENSG00000254082.1	CTD-2024D23.1	8.57744e-13	18.1344	UP
ENSG00000162545.5	CAMK2N1	8.6328e-13	-1.55245	DOWN
ENSG00000235070.3	AC068138.1	9.14147e-13	7.78083	UP
ENSG00000263154.1	RP11-1055B8.2	9.16718e-13	4.05477	UP
ENSG00000146267.11	FAXC	1.00253e-12	-3.61757	DOWN
ENSG00000000971.11	CFH	1.10445e-12	1.85058	UP
ENSG00000227293.1	AC118345.1	1.28586e-12	28.7486	UP
ENSG00000139209.11	SLC38A4	1.29633e-12	6.32972	UP
ENSG00000137309.15	HMGA1	1.39992e-12	-1.44701	DOWN
ENSG00000172020.8	GAP43	1.57736e-12	-1.6733	DOWN
ENSG00000237283.1	RP11-316I3.1	1.65311e-12	120.913	UP
ENSG00000272243.1	RP11-554D15.3	1.77278e-12	19.4326	UP
ENSG00000197587.6	DMBX1	1.84628e-12	6.38092	UP
ENSG00000134686.12	PHC2	1.86113e-12	-1.19868	DOWN
ENSG00000226965.1	AC003088.1	1.89852e-12	5.15846	UP
ENSG00000258551.1	RP11-661P17.1	2.06277e-12	6.02696	UP
ENSG00000151575.10	TEX9	2.0967e-12	2.07287	UP
ENSG00000241562.2	RPL7P5	2.29324e-12	6.41233	UP
ENSG00000238120.1	CTA-941F9.9	2.33841e-12	5.60735	UP
ENSG00000223751.1	AC116609.2	2.58206e-12	5.62813	UP
ENSG00000221725.1	RNU6ATAC25P	3.42352e-12	87.8374	UP
ENSG00000196159.7	FAT4	3.50402e-12	2.29761	UP
ENSG00000226486.1	LINC01035	3.65304e-12	38.6121	UP
ENSG00000150630.2	VEGFC	4.20351e-12	2.04115	UP
ENSG00000172478.13	C2ORF54	4.50508e-12	9.60272	UP
ENSG00000207811.1	MIR34B	4.58417e-12	10.2783	UP
ENSG00000023902.9	PLEKHO1	4.71408e-12	-1.32763	DOWN
ENSG00000167769.4	ACER1	4.82511e-12	2.90569	UP
ENSG00000232983.2	RP11-296L22.7	4.85276e-12	4.69075	UP
ENSG00000255606.1	AP000439.2	5.38637e-12	5.43013	UP
ENSG00000204775.4	KM-PA-2	5.49128e-12	4.45114	UP
ENSG00000258498.2	DIO3OS	5.91107e-12	2.91986	UP
ENSG00000259737.2	RP11-475A13.1	6.65094e-12	28.2901	UP
ENSG00000260417.1	CTD-2542L18.1	6.67327e-12	4.98692	UP
ENSG00000243220.1	AC006159.4	7.06452e-12	6.75915	UP
ENSG00000175600.11	C7ORF10	7.11965e-12	1.65766	UP
ENSG00000254933.1	RP11-619A14.2	7.23267e-12	8.25476	UP
ENSG00000109956.8	B3GAT1	7.6472e-12	-2.18893	DOWN
ENSG00000241695.1	GM2AP1	8.38649e-12	11.096	UP
ENSG00000238276.1	RP11-245J24.1	9.36699e-12	7.97823	UP
ENSG00000228156.1	RP11-410N8.1	9.37555e-12	6.40017	UP
ENSG00000111405.4	ENDOU	9.8867e-12	2.51516	UP
ENSG00000100079.5	LGALS2	1.13664e-11	2.26881	UP
ENSG00000250483.1	PPM1AP1	1.4564e-11	3.4483	UP
ENSG00000179636.10	TPPP2	1.52805e-11	3.6319	UP
ENSG00000259937.1	RP11-438D14.2	1.55297e-11	12.7746	UP
ENSG00000269859.1	CTD-2537I9.16	1.61649e-11	10.0081	UP
ENSG00000175906.4	ARL4D	1.71784e-11	1.46813	UP
ENSG00000147573.12	TRIM55	2.13748e-11	5.48581	UP
ENSG00000249425.1	RP11-502M1.2	2.23191e-11	9.55919	UP
ENSG00000186732.9	MPPED1	2.25176e-11	4.744	UP
ENSG00000254863.1	RP11-831A10.2	2.29687e-11	17.2087	UP
ENSG00000224163.3	RP11-309L24.6	2.32837e-11	4.9206	UP
ENSG00000233876.2	GAPDHP68	2.40665e-11	13.3125	UP
ENSG00000266110.1	MIR4423	2.41607e-11	7.8291	UP
ENSG00000249406.1	RP11-893F2.5	2.43268e-11	5.63256	UP
ENSG00000110975.4	SYT10	2.54327e-11	7.17617	UP
ENSG00000091831.17	ESR1	2.67968e-11	2.42588	UP
ENSG00000231705.1	RP11-432J24.2	2.68613e-11	6.14118	UP
ENSG00000261618.1	RP11-79H23.3	2.71168e-11	5.57518	UP
ENSG00000128833.8	MYO5C	2.85312e-11	2.00244	UP
ENSG00000092445.7	TYRO3	2.97302e-11	-1.58443	DOWN
ENSG00000180772.6	AGTR2	3.05737e-11	7.6867	UP
ENSG00000137726.11	FXYD6	3.10448e-11	-1.58067	DOWN
ENSG00000137975.7	CLCA2	3.27831e-11	6.67383	UP
ENSG00000226992.1	AC144525.1	3.30592e-11	54.8703	UP
ENSG00000234828.3	RP11-526A4.1	3.31414e-11	11.4071	UP
ENSG00000133710.11	SPINK5	3.71905e-11	4.68876	UP
ENSG00000236797.1	SPA17P1	4.06114e-11	3.59827	UP
ENSG00000166415.10	WDR72	4.25483e-11	8.92848	UP
ENSG00000226370.1	LINC00375	4.48926e-11	31.4977	UP
ENSG00000259664.1	CTD-2147F2.2	4.59322e-11	6.03799	UP
ENSG00000112183.10	RBM24	4.76781e-11	2.85412	UP
ENSG00000085741.8	WNT11	4.87198e-11	3.45798	UP
ENSG00000234634.1	AC003664.1	4.88716e-11	8.54902	UP
ENSG00000240721.2	RPS4XP15	5.40244e-11	21.1236	UP
ENSG00000184349.8	EFNA5	5.52474e-11	2.93626	UP
ENSG00000073331.13	ALPK1	6.19645e-11	1.92393	UP
ENSG00000248210.1	RP11-24I21.1	6.21629e-11	4.73805	UP
ENSG00000234710.1	AC060834.3	6.56388e-11	11.5563	UP
ENSG00000174473.11	GALNTL6	6.66958e-11	3.9352	UP
ENSG00000272235.1	RP11-22L13.1	6.88758e-11	3.37188	UP
ENSG00000260024.1	MRPS21P7	7.71937e-11	8.58342	UP
ENSG00000105605.3	CACNG7	7.82219e-11	-1.84932	DOWN
ENSG00000182379.9	NXPH4	8.03682e-11	2.23662	UP
ENSG00000253693.1	CTC-535M15.2	8.20364e-11	7.46709	UP
ENSG00000264766.1	AC079756.1	8.21217e-11	29.6904	UP
ENSG00000196403.4	OR10D1P	8.31126e-11	4.78777	UP
ENSG00000165702.8	GFI1B	8.51846e-11	4.70093	UP
ENSG00000264250.1	RN7SL835P	8.65503e-11	15.4256	UP
ENSG00000112964.9	GHR	8.79693e-11	1.90934	UP
ENSG00000120805.9	ARL1	9.32879e-11	1.1585	UP
ENSG00000125355.11	TMEM255A	9.70214e-11	-2.37769	DOWN
ENSG00000197616.7	MYH6	9.82747e-11	3.87599	UP
ENSG00000142627.9	EPHA2	1.09918e-10	1.73848	UP
ENSG00000077984.4	CST7	1.25933e-10	2.12493	UP
ENSG00000069943.5	PIGB	1.29863e-10	1.55028	UP
ENSG00000273172.1	AC108004.2	1.4476e-10	3.59951	UP
ENSG00000109208.4	SMR3A	1.4588e-10	9.72899	UP
ENSG00000254067.1	RP11-122L4.1	1.45945e-10	28.5111	UP
ENSG00000139330.5	KERA	1.45981e-10	9.46699	UP
ENSG00000250447.1	CTD-2081C10.1	1.56821e-10	6.64036	UP
ENSG00000154269.10	ENPP3	1.63192e-10	2.43634	UP
ENSG00000204001.5	LCN8	1.66348e-10	6.3283	UP
ENSG00000133315.6	MACROD1	1.66827e-10	1.32946	UP
ENSG00000225196.2	RP5-1118D24.2	1.70435e-10	11.181	UP
ENSG00000180383.3	DEFB124	1.71692e-10	4.44496	UP
ENSG00000270648.1	CYP2C61P	2.11394e-10	14.8286	UP
ENSG00000251126.2	RP11-119H12.6	2.34395e-10	6.27585	UP
ENSG00000175093.4	SPSB4	2.34976e-10	-2.70883	DOWN
ENSG00000165591.6	FAAH2	2.54464e-10	1.97051	UP
ENSG00000235885.3	AC023115.2	2.60328e-10	8.58259	UP
ENSG00000259524.1	RP11-461F11.1	2.6874e-10	6.81762	UP
ENSG00000170044.4	ZPLD1	2.81404e-10	5.23502	UP
ENSG00000261668.1	RP11-50D9.3	2.83769e-10	2.6672	UP
ENSG00000204128.5	C2ORF72	2.85712e-10	-2.03015	DOWN
ENSG00000198885.5	ITPRIPL1	3.05955e-10	-1.80347	DOWN
ENSG00000167470.8	MIDN	3.25894e-10	1.22813	UP
ENSG00000257124.2	RP11-384P14.1	3.3904e-10	12.9643	UP
ENSG00000162490.6	DRAXIN	3.39047e-10	-2.55657	DOWN
ENSG00000119801.8	YPEL5	3.55544e-10	1.12839	UP
ENSG00000236013.1	RP3-332B22.1	3.57187e-10	5.74762	UP
ENSG00000205420.6	KRT6A	3.62108e-10	4.74497	UP
ENSG00000184956.11	MUC6	3.94388e-10	5.44738	UP
ENSG00000227019.2	OR7E101P	3.97784e-10	4.76885	UP
ENSG00000249742.1	RP11-217E13.1	4.08738e-10	12.6523	UP
ENSG00000099804.4	CDC34	4.19487e-10	1.20131	UP
ENSG00000271036.1	CLPTM1LP1	4.21647e-10	132.353	UP
ENSG00000235279.1	RP11-539E19.2	4.23674e-10	10.6966	UP
ENSG00000156206.9	C15ORF26	4.86402e-10	3.63004	UP
ENSG00000181031.11	RPH3AL	5.18067e-10	1.81766	UP
ENSG00000267745.1	RP11-686D22.8	5.20313e-10	2.17549	UP
ENSG00000253236.1	CTD-2313P7.1	5.2604e-10	24.6099	UP
ENSG00000157833.8	GAREML	5.51875e-10	-2.10112	DOWN
ENSG00000260682.2	7SK	5.52048e-10	2.17357	UP
ENSG00000204393.3	RP11-410N8.4	5.53868e-10	6.14576	UP
ENSG00000105722.5	ERF	5.59801e-10	1.22065	UP
ENSG00000250703.1	CTD-2533K21.1	5.81517e-10	17.1105	UP
ENSG00000204183.1	GDF5OS	5.82856e-10	12.4747	UP
ENSG00000262920.1	RP11-1260E13.1	5.95169e-10	5.30356	UP
ENSG00000171813.10	PWWP2B	6.20334e-10	1.41377	UP
ENSG00000221363.1	RNU6ATAC20P	6.37395e-10	10500	UP
ENSG00000155011.4	DKK2	7.05764e-10	3.48425	UP
ENSG00000230362.1	RP11-809F4.2	7.90935e-10	7.17816	UP
ENSG00000251033.1	CTD-2533K21.4	8.04168e-10	38.032	UP
ENSG00000268985.1	CTD-2528A14.1	8.319e-10	11.9267	UP
ENSG00000236365.1	RP5-849L7.1	8.52291e-10	15.3845	UP
ENSG00000092758.11	COL9A3	8.5505e-10	-2.21046	DOWN
ENSG00000231483.1	RP11-336A10.5	8.56969e-10	9.23176	UP
ENSG00000185532.10	PRKG1	8.74656e-10	2.23529	UP
ENSG00000100003.13	SEC14L2	8.786e-10	-1.74793	DOWN
ENSG00000272784.1	RP11-335L23.5	8.82098e-10	2.85409	UP
ENSG00000150593.11	PDCD4	9.14764e-10	1.23098	UP
ENSG00000267417.1	CTC-239J10.1	9.16873e-10	2.38116	UP
ENSG00000049540.12	ELN	9.36942e-10	1.52136	UP
ENSG00000263176.1	RP11-893F2.15	9.52924e-10	6.7218	UP
ENSG00000253773.1	KB-1047C11.2	1.12063e-09	2.22446	UP
ENSG00000082175.10	PGR	1.12571e-09	4.99744	UP
ENSG00000232225.2	LINC01047	1.13771e-09	55.9217	UP
ENSG00000259761.1	RP11-138H10.2	1.16485e-09	8.0535	UP
ENSG00000006015.13	C19ORF60	1.19694e-09	1.23675	UP
ENSG00000231210.2	AC006159.3	1.25884e-09	6.53717	UP
ENSG00000165349.7	SLC7A3	1.25894e-09	2.62157	UP
ENSG00000226286.1	RP1-163G9.2	1.30395e-09	6.51772	UP
ENSG00000159784.13	FAM131B	1.32344e-09	-1.75247	DOWN
ENSG00000234273.1	AC073071.1	1.32533e-09	8.03759	UP
ENSG00000141338.9	ABCA8	1.36524e-09	2.00417	UP
ENSG00000249838.1	SUMO2P7	1.37424e-09	22.6011	UP
ENSG00000249752.1	RP11-563M4.1	1.42167e-09	3.50396	UP
ENSG00000255282.2	WTAPP1	1.43453e-09	7.49655	UP
ENSG00000253949.1	RP11-790J24.1	1.47934e-09	9.54782	UP
ENSG00000214546.3	AC087491.2	1.56037e-09	2.89763	UP
ENSG00000125246.11	CLYBL	1.56651e-09	1.7623	UP
ENSG00000108375.8	RNF43	1.6237e-09	3.40199	UP
ENSG00000170054.10	SERPINA9	1.65054e-09	5.9354	UP
ENSG00000153347.5	FAM81B	1.67486e-09	3.93113	UP
ENSG00000171282.9	RP11-1055B8.7	1.70439e-09	1.49294	UP
ENSG00000261206.1	LINC00561	1.752e-09	13.3892	UP
ENSG00000258583.1	RP11-112J1.2	1.78551e-09	5.70768	UP
ENSG00000169692.8	AGPAT2	1.83521e-09	1.53218	UP
ENSG00000198277.5	RP11-468N14.09	1.86399e-09	8.1275	UP
ENSG00000105419.13	MEIS3	1.95699e-09	-1.76384	DOWN
ENSG00000248712.3	CCDC153	2.07041e-09	1.94497	UP
ENSG00000240033.1	RP11-12K11.2	2.07227e-09	7.94913	UP
ENSG00000233997.1	AP000475.2	2.0792e-09	10.9247	UP
ENSG00000224586.2	GPX5	2.11817e-09	29.164	UP
ENSG00000104432.8	IL7	2.2344e-09	2.18669	UP
ENSG00000266010.1	GATA6-AS1	2.25334e-09	6.99018	UP
ENSG00000007312.8	CD79B	2.31519e-09	2.18829	UP
ENSG00000133678.9	TMEM254	2.35343e-09	1.2016	UP
ENSG00000125879.4	OTOR	2.51985e-09	8.69345	UP
ENSG00000116670.10	MAD2L2	2.54881e-09	-1.27628	DOWN
ENSG00000248174.1	RP11-148L24.1	3.218e-09	4.21472	UP
ENSG00000141161.7	UNC45B	3.3917e-09	6.2796	UP
ENSG00000115423.14	DNAH6	3.54636e-09	2.51926	UP
ENSG00000171102.10	OBP2B	3.54804e-09	4.84396	UP
ENSG00000166152.3	C16ORF78	3.5728e-09	3.9134	UP
ENSG00000238755.3	RP11-23D24.2	3.67229e-09	3.00615	UP
ENSG00000253177.1	RP11-100L22.1	3.70675e-09	4.69056	UP
ENSG00000251373.1	RP11-68D16.1	3.72834e-09	25.248	UP
ENSG00000241168.1	RP11-10O22.1	3.83622e-09	13.9084	UP
ENSG00000251179.1	RP11-893F2.9	3.94768e-09	2.79962	UP
ENSG00000258179.1	RP11-248E9.7	4.03968e-09	13.6954	UP
ENSG00000224017.1	AC005022.1	4.24489e-09	3.52558	UP
ENSG00000116785.9	CFHR3	4.29294e-09	5.04441	UP
ENSG00000223392.1	CLDN10-AS1	4.35974e-09	13.2565	UP
ENSG00000271368.1	RP11-10E6.1	4.40245e-09	11.6203	UP
ENSG00000016490.11	CLCA1	4.43148e-09	8.8096	UP
ENSG00000169218.9	RSPO1	4.44023e-09	6.70852	UP
ENSG00000134882.11	UBAC2	4.45851e-09	1.12005	UP
ENSG00000142611.12	PRDM16	4.49083e-09	2.32492	UP
ENSG00000230157.1	ATP5G1P1	4.49243e-09	5.0036	UP
ENSG00000070081.11	NUCB2	4.49827e-09	1.25118	UP
ENSG00000183535.5	COL18A1-AS1	4.60249e-09	4.54076	UP
ENSG00000155761.9	SPAG17	4.7586e-09	3.1198	UP
ENSG00000020181.13	GPR124	5.06735e-09	1.60109	UP
ENSG00000236012.2	HIGD1AP12	5.07053e-09	6.78993	UP
ENSG00000254042.1	CTC-558O2.1	5.12654e-09	11.6377	UP
ENSG00000049089.9	COL9A2	5.28977e-09	-1.83506	DOWN
ENSG00000227795.1	AC092796.1	5.4034e-09	18.2056	UP
ENSG00000170927.10	PKHD1	5.54133e-09	4.00056	UP
ENSG00000256341.1	RP11-21A7A.3	5.72427e-09	2.83281	UP
ENSG00000139800.8	ZIC5	5.88426e-09	2.44614	UP
ENSG00000197540.3	GZMM	5.90123e-09	1.8515	UP
ENSG00000101282.4	RSPO4	5.99152e-09	2.36974	UP
ENSG00000255346.5	NOX5	6.0906e-09	4.07225	UP
ENSG00000233901.1	RP11-65J3.1	6.13393e-09	1.56176	UP
ENSG00000266998.1	RP11-936I5.1	6.24675e-09	3.43857	UP
ENSG00000228611.2	HNF4GP1	6.27641e-09	52.7322	UP
ENSG00000187147.13	RNF220	6.42361e-09	1.20714	UP
ENSG00000249028.2	RP5-951N9.1	6.53472e-09	6.61471	UP
ENSG00000125650.4	PSPN	6.96615e-09	1.35834	UP
ENSG00000257729.1	RP11-788H18.1	6.96662e-09	21.958	UP
ENSG00000259978.1	MRPS21P8	7.07599e-09	13.2662	UP
ENSG00000249837.1	CTD-2325B11.1	7.21581e-09	8.11261	UP
ENSG00000160789.15	LMNA	7.22455e-09	1.25126	UP
ENSG00000261273.1	LA16C-444G7.1	7.28698e-09	4.38761	UP
ENSG00000224851.1	LINC00502	7.89516e-09	5.8212	UP
ENSG00000227959.1	RP11-276H7.2	7.93335e-09	2.59211	UP
ENSG00000233555.2	RP11-452D2.1	7.93721e-09	10.4067	UP
ENSG00000259107.1	LINC00911	8.13059e-09	8.23187	UP
ENSG00000157150.4	TIMP4	8.37658e-09	-2.25158	DOWN
ENSG00000144834.8	TAGLN3	8.74444e-09	-2.16199	DOWN
ENSG00000168671.5	UGT3A2	8.74668e-09	3.75732	UP
ENSG00000083307.6	GRHL2	8.83832e-09	4.71516	UP
ENSG00000264151.1	RP11-739N10.1	8.84086e-09	7.7302	UP
ENSG00000067191.11	CACNB1	8.95909e-09	1.43819	UP
ENSG00000227434.2	RNF19BPX	9.00728e-09	77.547	UP
ENSG00000198889.3	DCAF12L1	9.1448e-09	6.16762	UP
ENSG00000137675.4	MMP27	9.50785e-09	5.63087	UP
ENSG00000184303.4	DRD5P1	9.77839e-09	6.31127	UP
ENSG00000182224.7	CYB5D1	9.82055e-09	1.26912	UP
ENSG00000179241.8	LDLRAD3	9.86603e-09	-1.41122	DOWN
ENSG00000231620.1	AP000855.4	9.90856e-09	19.2004	UP
ENSG00000229847.4	EMX2OS	1.02992e-08	3.05573	UP
ENSG00000235531.5	RP11-383H13.1	1.08897e-08	2.87915	UP
ENSG00000134533.2	RERG	1.10231e-08	2.14901	UP
ENSG00000140463.9	BBS4	1.12363e-08	1.18943	UP
ENSG00000072182.8	ASIC4	1.15934e-08	1.76126	UP
ENSG00000113657.8	DPYSL3	1.16498e-08	-1.24214	DOWN
ENSG00000140025.11	EFCAB11	1.19671e-08	1.42566	UP
ENSG00000125820.5	NKX2-2	1.25195e-08	-3.08634	DOWN
ENSG00000261498.1	LINC00566	1.25816e-08	9.03305	UP
ENSG00000271222.1	RP11-1072C15.7	1.26016e-08	13.7135	UP
ENSG00000087266.11	SH3BP2	1.26603e-08	-1.42087	DOWN
ENSG00000166603.3	MC4R	1.26624e-08	4.36629	UP
ENSG00000099337.3	KCNK6	1.27989e-08	1.69743	UP
ENSG00000188833.5	ENTPD8	1.28199e-08	3.78936	UP
ENSG00000141744.3	PNMT	1.35476e-08	2.79763	UP
ENSG00000257940.1	RP11-248E9.6	1.36011e-08	11.4216	UP
ENSG00000273288.1	AC108004.5	1.4723e-08	4.35571	UP
ENSG00000226037.1	LINC01040	1.519e-08	14.3433	UP
ENSG00000118707.5	TGIF2	1.62395e-08	1.39936	UP
ENSG00000137077.3	CCL21	1.65119e-08	5.05054	UP
ENSG00000136694.8	IL36A	1.68214e-08	5.6887	UP
ENSG00000188523.4	C9ORF171	1.68735e-08	2.81945	UP
ENSG00000165186.9	PTCHD1	1.69959e-08	-6.08307	DOWN
ENSG00000250821.1	RP11-345F18.1	1.76434e-08	5.3018	UP
ENSG00000270179.1	RP11-159N11.4	1.89438e-08	2.34618	UP
ENSG00000253756.1	RP11-192P9.1	1.90022e-08	51.7814	UP
ENSG00000185000.5	DGAT1	1.901e-08	1.17199	UP
ENSG00000201065.1	RNU6-461P	1.93417e-08	10500	UP
ENSG00000043355.6	ZIC2	1.94863e-08	1.81831	UP
ENSG00000260975.1	RP11-142G1.3	1.9611e-08	35.7442	UP
ENSG00000235264.1	RPL5P28	1.97637e-08	7.85546	UP
ENSG00000134207.10	SYT6	2.04817e-08	-2.70016	DOWN
ENSG00000227659.1	CLYBL-AS2	2.11094e-08	5.28248	UP
ENSG00000166295.4	ANAPC16	2.12623e-08	1.14118	UP
ENSG00000258970.1	RP11-100M12.1	2.14155e-08	25.6921	UP
ENSG00000196549.6	MME	2.19262e-08	4.38981	UP
ENSG00000149294.12	NCAM1	2.22979e-08	-1.44262	DOWN
ENSG00000254366.2	RP11-38H17.1	2.25139e-08	16.3445	UP
ENSG00000229667.2	UBE2V1P9	2.26041e-08	17.1015	UP
ENSG00000254620.1	RP5-907D15.3	2.2621e-08	4.21234	UP
ENSG00000232100.1	RP11-152L7.2	2.27191e-08	53.657	UP
ENSG00000237125.4	HAND2-AS1	2.37865e-08	5.84836	UP
ENSG00000131409.8	LRRC4B	2.38121e-08	1.30447	UP
ENSG00000116726.4	PRAMEF12	2.39309e-08	5.34624	UP
ENSG00000258505.1	RP11-90P16.1	2.43867e-08	19.5235	UP
ENSG00000243012.1	RP11-292E2.4	2.44217e-08	4.91316	UP
ENSG00000135437.5	RDH5	2.60003e-08	1.96987	UP
ENSG00000088320.3	REM1	2.60767e-08	2.33341	UP
ENSG00000265142.2	MIR133A1	2.84759e-08	3.81019	UP
ENSG00000170890.9	PLA2G1B	2.86668e-08	2.42337	UP
ENSG00000168679.13	SLC16A4	2.88779e-08	1.46982	UP
ENSG00000272724.1	RP1-288H2.4	2.89247e-08	10.0586	UP
ENSG00000122691.8	TWIST1	2.89402e-08	2.28198	UP
ENSG00000235725.1	AC007389.3	2.90915e-08	14.7592	UP
ENSG00000083782.3	EPYC	2.91368e-08	11.9571	UP
ENSG00000153064.7	BANK1	2.96338e-08	2.53869	UP
ENSG00000204580.7	DDR1	2.99185e-08	-1.24506	DOWN
ENSG00000249882.1	RP11-665I14.1	3.07289e-08	24.8669	UP
ENSG00000087494.11	PTHLH	3.07435e-08	2.55433	UP
ENSG00000187773.7	FAM69C	3.16921e-08	-2.4078	DOWN
ENSG00000164070.7	HSPA4L	3.17604e-08	1.56905	UP
ENSG00000073792.11	IGF2BP2	3.21758e-08	-2.86822	DOWN
ENSG00000162975.3	KCNF1	3.28485e-08	-2.33217	DOWN
ENSG00000164953.11	TMEM67	3.33211e-08	1.56836	UP
ENSG00000179431.5	FJX1	3.33906e-08	-1.42532	DOWN
ENSG00000272342.1	RP13-539J13.1	3.34007e-08	7.90575	UP
ENSG00000228065.6	RP11-222A11.1	3.44367e-08	2.29662	UP
ENSG00000186009.4	ATP4B	3.49072e-08	3.6489	UP
ENSG00000097021.15	ACOT7	3.64707e-08	-1.33969	DOWN
ENSG00000223488.2	MAPK6PS2	3.71625e-08	9.61456	UP
ENSG00000226425.1	RP11-348J12.2	3.71874e-08	3.99835	UP
ENSG00000123124.9	WWP1	3.77016e-08	1.27733	UP
ENSG00000101448.9	EPPIN	3.77622e-08	6.85437	UP
ENSG00000208024.1	MIR199A2	3.84947e-08	4.66777	UP
ENSG00000122870.7	BICC1	3.92317e-08	1.77521	UP
ENSG00000268913.1	AC026806.2	4.04762e-08	1.64066	UP
ENSG00000039537.9	C6	4.10043e-08	5.36032	UP
ENSG00000269933.1	RP3-333A15.2	4.10716e-08	6.66843	UP
ENSG00000140285.5	FGF7	4.1123e-08	5.23707	UP
ENSG00000144857.10	BOC	4.14874e-08	1.62973	UP
ENSG00000186471.8	AKAP14	4.1681e-08	3.05242	UP
ENSG00000216022.1	AC068062.1	4.17247e-08	13.0749	UP
ENSG00000166275.11	C10ORF32	4.17873e-08	1.27986	UP
ENSG00000141576.10	RNF157	4.44367e-08	-1.44409	DOWN
ENSG00000237667.1	AC113607.1	4.49389e-08	7.18029	UP
ENSG00000253580.1	RP11-790J24.2	4.5109e-08	10.6433	UP
ENSG00000167646.9	DNAAF3	4.54665e-08	2.75217	UP
ENSG00000243207.2	PPAN-P2RY11	4.62754e-08	7.26594	UP
ENSG00000077942.13	FBLN1	4.63001e-08	1.5402	UP
ENSG00000225165.3	CTD-2538A21.1	4.70202e-08	6.24246	UP
ENSG00000271334.1	CTD-2078B5.2	4.83807e-08	2.68011	UP
ENSG00000253414.2	RP11-150O12.6	4.92493e-08	2.42715	UP
ENSG00000168646.8	AXIN2	5.03793e-08	1.39293	UP
ENSG00000257108.1	NHLRC4	5.04704e-08	1.98591	UP
ENSG00000254586.1	RP11-358H18.3	5.05528e-08	51.9173	UP
ENSG00000233354.1	LINC00028	5.08728e-08	3.85954	UP
ENSG00000224788.1	RP5-933E2.1	5.12119e-08	39.2763	UP
ENSG00000258311.1	RP11-644F5.10	5.14516e-08	1.75065	UP
ENSG00000136003.11	ISCU	5.38628e-08	1.13934	UP
ENSG00000272636.1	DOC2B	5.44249e-08	2.0378	UP
ENSG00000165061.10	ZMAT4	5.4903e-08	2.50462	UP
ENSG00000160360.7	GPSM1	5.51407e-08	-1.35289	DOWN
ENSG00000237480.1	RP5-947P14.1	5.55787e-08	9.27268	UP
ENSG00000250563.1	KNOP1P5	5.67465e-08	8.53722	UP
ENSG00000126878.8	AIF1L	5.69327e-08	-1.47366	DOWN
ENSG00000228033.1	AC010967.2	5.69922e-08	6.44627	UP
ENSG00000222017.1	AC011997.1	5.71481e-08	4.16146	UP
ENSG00000166104.10	HSA-MIR-7162	5.85192e-08	5.60802	UP
ENSG00000160588.5	MPZL3	5.86008e-08	1.79989	UP
ENSG00000185305.6	ARL15	5.89639e-08	1.36749	UP
ENSG00000178026.8	FAM211B	5.9377e-08	-1.45735	DOWN
ENSG00000131759.13	RARA	5.95511e-08	1.27598	UP
ENSG00000229882.1	RP13-30A9.2	6.15445e-08	20.6796	UP
ENSG00000229214.1	LINC00242	6.19007e-08	2.22925	UP
ENSG00000088756.8	ARHGAP28	6.22527e-08	2.32177	UP
ENSG00000250740.1	RP11-710F7.2	6.29169e-08	4.5105	UP
ENSG00000232749.1	RP11-15B24.4	6.29806e-08	8.69912	UP
ENSG00000243543.4	WFDC6	6.33201e-08	6.57765	UP
ENSG00000180209.7	MYLPF	6.37232e-08	2.55385	UP
ENSG00000222643.1	AL603632.1	6.60038e-08	10500	UP
ENSG00000124701.5	APOBEC2	6.75264e-08	2.5509	UP
ENSG00000158856.13	DMTN	6.90431e-08	1.64066	UP
ENSG00000248610.1	HSPA8P4	7.18156e-08	2.7554	UP
ENSG00000102805.9	CLN5	7.21751e-08	1.19101	UP
ENSG00000121104.3	FAM117A	7.24784e-08	1.34103	UP
ENSG00000254781.1	GVINP2	7.30842e-08	7.96416	UP
ENSG00000063660.4	GPC1	7.37963e-08	-1.33629	DOWN
ENSG00000255183.1	RP11-720D4.3	7.41825e-08	9.45032	UP
ENSG00000249616.1	CTD-2194F12.1	7.4347e-08	30.0635	UP
ENSG00000213996.8	TM6SF2	7.70743e-08	-3.58938	DOWN
ENSG00000238033.1	AC002480.2	7.95958e-08	5.52233	UP
ENSG00000223843.3	EFCAB6-AS1	8.00964e-08	3.88564	UP
ENSG00000122756.10	CNTFR	8.15596e-08	1.67212	UP
ENSG00000250954.1	RP11-79E3.3	8.45919e-08	22.0124	UP
ENSG00000028137.12	TNFRSF1B	8.55726e-08	1.36306	UP
ENSG00000261749.2	RP11-152O14.1	8.66283e-08	14.2601	UP
ENSG00000214114.4	MYCBP	8.79936e-08	1.33816	UP
ENSG00000158813.13	EDA	8.83572e-08	1.6893	UP
ENSG00000008441.12	NFIX	8.97391e-08	1.24357	UP
ENSG00000168904.10	LRRC28	9.00675e-08	1.24127	UP
ENSG00000187955.7	COL14A1	9.1319e-08	1.93209	UP
ENSG00000172367.11	PDZD3	9.67812e-08	2.92112	UP
ENSG00000147654.10	EBAG9	1.0118e-07	1.17143	UP
ENSG00000224521.1	RP11-438F14.3	1.01219e-07	23.5692	UP
ENSG00000115266.7	APC2	1.01836e-07	-1.71346	DOWN
ENSG00000197594.7	ENPP1	1.02262e-07	1.82745	UP
ENSG00000183644.9	C11ORF88	1.04878e-07	4.90906	UP
ENSG00000168907.9	PLA2G4F	1.10116e-07	6.12358	UP
ENSG00000224714.2	RP11-179K3.2	1.13661e-07	8.89428	UP
ENSG00000182256.8	GABRG3	1.14096e-07	2.92155	UP
ENSG00000257817.1	RP4-601P9.2	1.19234e-07	5.87734	UP
ENSG00000050628.16	PTGER3	1.19693e-07	4.5182	UP
ENSG00000272619.1	RP11-563K23.1	1.1976e-07	-2.77118	DOWN
ENSG00000122707.7	RECK	1.21253e-07	1.36915	UP
ENSG00000165799.4	RNASE7	1.23342e-07	3.63779	UP
ENSG00000175311.5	ANKS4B	1.23714e-07	6.27763	UP
ENSG00000137070.13	IL11RA	1.2402e-07	1.44442	UP
ENSG00000227418.2	PCGEM1	1.25268e-07	70.8799	UP
ENSG00000248464.1	RP11-473L15.2	1.27078e-07	9.07947	UP
ENSG00000269113.3	TRABD2B	1.27519e-07	2.68576	UP
ENSG00000188365.3	AC092171.2	1.3303e-07	1.943	UP
ENSG00000237539.1	GS1-594A7.5	1.34273e-07	14.7966	UP
ENSG00000260827.1	RP11-1437A8.4	1.36371e-07	10500	UP
ENSG00000265029.1	AC023158.1	1.44064e-07	16.7525	UP
ENSG00000267687.1	RP11-325K19.6	1.4569e-07	11.2022	UP
ENSG00000258947.2	TUBB3	1.45815e-07	-3.5534	DOWN
ENSG00000131067.12	GGT7	1.46686e-07	-1.23424	DOWN
ENSG00000189067.8	LITAF	1.46909e-07	-1.23902	DOWN
ENSG00000204403.5	CASP12	1.48543e-07	2.21115	UP
ENSG00000254872.2	RP13-870H17.3	1.52892e-07	3.81981	UP
ENSG00000236098.1	RP11-148B18.4	1.53807e-07	2.99388	UP
ENSG00000228247.1	UBBP2	1.57334e-07	4.97076	UP
ENSG00000116584.13	ARHGEF2	1.61954e-07	-1.23447	DOWN
ENSG00000183307.3	CECR6	1.63389e-07	-1.99799	DOWN
ENSG00000171365.11	CLCN5	1.64577e-07	1.41875	UP
ENSG00000010932.11	FMO1	1.72286e-07	2.93832	UP
ENSG00000116254.13	CHD5	1.73867e-07	2.48988	UP
ENSG00000254647.2	INS	1.84992e-07	9.37009	UP
ENSG00000171246.5	NPTX1	1.90013e-07	2.16893	UP
ENSG00000248429.1	RP11-597D13.9	1.91975e-07	2.26551	UP
ENSG00000138036.14	DYNC2LI1	1.92913e-07	1.25148	UP
ENSG00000254690.1	GS1-393G12.12	1.95734e-07	1.30839	UP
ENSG00000230991.1	AC092625.1	1.97112e-07	52.4249	UP
ENSG00000225884.2	AC098872.3	2.14431e-07	7.60303	UP
ENSG00000231817.3	RP11-189B4.6	2.17911e-07	3.31855	UP
ENSG00000185742.6	C11ORF87	2.1886e-07	3.0599	UP
ENSG00000261662.1	RP5-1042I8.7	2.20126e-07	1.50534	UP
ENSG00000248547.2	RP11-468N14.6	2.22239e-07	14.64	UP
ENSG00000128283.6	CDC42EP1	2.23862e-07	1.22357	UP
ENSG00000238077.1	NMNAT1P3	2.23873e-07	4.91823	UP
ENSG00000060982.10	BCAT1	2.24494e-07	-1.86224	DOWN
ENSG00000269679.1	AC018445.1	2.25209e-07	3.74903	UP
ENSG00000259531.2	RP11-295H24.3	2.26556e-07	2.76834	UP
ENSG00000230096.1	RP11-34C15.2	2.2659e-07	37.2832	UP
ENSG00000255216.1	RP11-831A10.1	2.27864e-07	4.3765	UP
ENSG00000215397.3	SCRT2	2.32089e-07	3.24156	UP
ENSG00000259170.1	RP11-763K15.1	2.32117e-07	5.75358	UP
ENSG00000065320.4	NTN1	2.34241e-07	-1.74603	DOWN
ENSG00000147655.6	RSPO2	2.39135e-07	2.92262	UP
ENSG00000198104.2	OR2T6	2.43882e-07	7.42646	UP
ENSG00000205593.7	DENND6B	2.44128e-07	1.33547	UP
ENSG00000150667.6	FSIP1	2.44297e-07	1.6589	UP
ENSG00000234402.1	ELK2BP	2.44385e-07	4.37017	UP
ENSG00000143149.8	ALDH9A1	2.44398e-07	1.1174	UP
ENSG00000123472.8	ATPAF1	2.47557e-07	1.1606	UP
ENSG00000180921.6	FAM83H	2.53213e-07	1.8688	UP
ENSG00000230630.1	DNM3OS	2.53923e-07	2.7195	UP
ENSG00000141448.4	GATA6	2.53964e-07	4.0546	UP
ENSG00000260833.2	AC124789.1	2.64775e-07	2.45148	UP
ENSG00000258768.2	CTD-2292M16.8	2.65898e-07	1.8672	UP
ENSG00000135472.4	FAIM2	2.6828e-07	-1.60776	DOWN
ENSG00000251381.2	LINC00958	2.70257e-07	3.41673	UP
ENSG00000244024.1	RP11-622L21.1	2.72551e-07	16.6431	UP
ENSG00000070193.4	FGF10	2.7611e-07	5.34683	UP
ENSG00000067141.12	NEO1	2.76333e-07	1.25141	UP
ENSG00000099331.9	MYO9B	2.8378e-07	-1.22736	DOWN
ENSG00000143457.6	GOLPH3L	2.84355e-07	1.21055	UP
ENSG00000147606.4	SLC26A7	2.84424e-07	3.46413	UP
ENSG00000104327.3	CALB1	2.86323e-07	2.72322	UP
ENSG00000114446.4	IFT57	2.89095e-07	1.17843	UP
ENSG00000248173.1	RP11-659O3.1	2.91661e-07	66.407	UP
ENSG00000241269.1	AC093620.5	2.94425e-07	1.66744	UP
ENSG00000173848.14	NET1	3.00578e-07	1.35459	UP
ENSG00000108244.12	KRT23	3.01081e-07	4.04883	UP
ENSG00000197475.7	ADAM3A	3.01416e-07	8.53491	UP
ENSG00000174899.6	C3ORF55	3.03732e-07	5.21877	UP
ENSG00000131951.6	LRRC9	3.10245e-07	3.42339	UP
ENSG00000160161.5	CILP2	3.14556e-07	3.05864	UP
ENSG00000011332.15	DPF1	3.1868e-07	-1.73921	DOWN
ENSG00000259403.1	RP11-315L6.1	3.18831e-07	13.7682	UP
ENSG00000205562.1	RP11-497E19.1	3.19558e-07	2.65706	UP
ENSG00000244694.3	PTCHD4	3.20244e-07	2.38527	UP
ENSG00000246877.1	DNM1P35	3.20479e-07	2.29365	UP
ENSG00000250271.1	RP11-64D22.5	3.25457e-07	4.12834	UP
ENSG00000112115.5	IL17A	3.32438e-07	10.7789	UP
ENSG00000171310.6	CHST11	3.39705e-07	-1.31698	DOWN
ENSG00000248484.1	RP11-375B1.1	3.4001e-07	13.1089	UP
ENSG00000269729.1	AC006262.4	3.44422e-07	4.35353	UP
ENSG00000207141.1	RNU6-802P	3.45821e-07	10.9523	UP
ENSG00000132623.11	ANKEF1	3.50444e-07	1.86597	UP
ENSG00000271426.1	RP4-718P11.1	3.50779e-07	5.48766	UP
ENSG00000120057.4	SFRP5	3.52816e-07	3.23543	UP
ENSG00000111145.3	ELK3	3.69333e-07	1.31722	UP
ENSG00000115252.14	PDE1A	3.7024e-07	2.05008	UP
ENSG00000130592.9	LSP1	3.72164e-07	1.58916	UP
ENSG00000147400.8	CETN2	3.74125e-07	1.16959	UP
ENSG00000231814.2	LINC00210	3.79889e-07	31.5176	UP
ENSG00000151611.9	MMAA	3.80652e-07	1.26492	UP
ENSG00000237149.4	ZNF503-AS2	3.81427e-07	1.59558	UP
ENSG00000207562.1	MIR34C	3.8251e-07	6.23958	UP
ENSG00000251441.2	RTEL1P1	3.85109e-07	3.08152	UP
ENSG00000112419.10	PHACTR2	3.87762e-07	1.71754	UP
ENSG00000258394.1	CTD-2307P3.1	3.91069e-07	8.51805	UP
ENSG00000232114.1	AC018693.5	4.01209e-07	11.0283	UP
ENSG00000224048.1	AC104777.4	4.15865e-07	6.53798	UP
ENSG00000110318.9	KIAA1377	4.2393e-07	1.64688	UP
ENSG00000080224.13	EPHA6	4.28818e-07	4.09152	UP
ENSG00000116985.6	BMP8B	4.33939e-07	-2.40876	DOWN
ENSG00000199161.1	MIR126	4.34601e-07	1.95189	UP
ENSG00000249392.1	RP11-725D20.1	4.36916e-07	9.88366	UP
ENSG00000213420.3	GPC2	4.4435e-07	-1.8625	DOWN
ENSG00000164626.8	KCNK5	4.44432e-07	2.3026	UP
ENSG00000151748.10	SAV1	4.47064e-07	1.20016	UP
ENSG00000262213.1	AC144836.1	4.49451e-07	6.00883	UP
ENSG00000224743.2	TEX26-AS1	4.73639e-07	3.22238	UP
ENSG00000250791.1	RP11-55L3.1	4.92056e-07	41.2742	UP
ENSG00000233293.1	RP11-410N8.3	5.23509e-07	2.7412	UP
ENSG00000119661.10	DNAL1	5.30678e-07	1.26017	UP
ENSG00000178343.4	SHISA3	5.3673e-07	2.5315	UP
ENSG00000114670.9	NEK11	5.39626e-07	1.43484	UP
ENSG00000249153.1	CTD-2036A18.2	5.40952e-07	40.1626	UP
ENSG00000157869.10	RAB28	5.55129e-07	1.15929	UP
ENSG00000236045.1	RP3-467K16.7	5.6812e-07	3.21425	UP
ENSG00000261829.1	RP11-223I10.1	5.69141e-07	-2.79172	DOWN
ENSG00000166035.6	LIPC	5.72731e-07	2.376	UP
ENSG00000253148.1	RGS21	5.76673e-07	9.91142	UP
ENSG00000127946.12	HIP1	5.8441e-07	-1.36316	DOWN
ENSG00000185386.10	MAPK11	5.87005e-07	1.28417	UP
ENSG00000204957.1	AC006486.1	6.03876e-07	2.18519	UP
ENSG00000169618.4	PROKR1	6.04587e-07	3.90006	UP
ENSG00000233211.2	GRPEL2P1	6.05245e-07	14.6746	UP
ENSG00000267620.1	RP11-795H16.2	6.11103e-07	6.90102	UP
ENSG00000100296.9	THOC5	6.2041e-07	-1.28636	DOWN
ENSG00000152939.10	MARVELD2	6.2161e-07	1.72147	UP
ENSG00000109452.8	INPP4B	6.32123e-07	1.87968	UP
ENSG00000259974.2	LINC00261	6.50764e-07	13.2734	UP
ENSG00000246316.3	RP11-492A10.1	6.56872e-07	4.58819	UP
ENSG00000125378.11	BMP4	6.5878e-07	1.83114	UP
ENSG00000249509.1	RP11-402J6.1	6.6025e-07	5.11085	UP
ENSG00000248698.1	LINC01085	6.60302e-07	2.38188	UP
ENSG00000088280.14	ASAP3	6.60498e-07	-1.39133	DOWN
ENSG00000251477.1	RP11-74D3.2	6.60545e-07	45.7899	UP
ENSG00000129474.11	AJUBA	6.62124e-07	1.56123	UP
ENSG00000054392.8	HHAT	6.69535e-07	1.5285	UP
ENSG00000016391.6	CHDH	6.7423e-07	-1.90468	DOWN
ENSG00000265217.1	RP11-775G23.1	6.92556e-07	7.48898	UP
ENSG00000231072.1	GAPDHP64	6.92678e-07	13.087	UP
ENSG00000103528.12	SYT17	6.93332e-07	-1.43064	DOWN
ENSG00000248307.1	LINC00616	7.00298e-07	8.57607	UP
ENSG00000267532.2	MIR497HG	7.00795e-07	1.80901	UP
ENSG00000007372.16	PAX6	7.16819e-07	1.71577	UP
ENSG00000142973.8	CYP4B1	7.2138e-07	3.7478	UP
ENSG00000248222.1	CTB-174D11.1	7.23463e-07	6.23209	UP
ENSG00000236117.1	RP4-754E20__A.5	7.23733e-07	8.97666	UP
ENSG00000102048.11	ASB9	7.29625e-07	1.79703	UP
ENSG00000228035.1	RP4-663N10.1	7.37468e-07	4.03728	UP
ENSG00000227630.2	RP4-781K5.8	7.39491e-07	2.18371	UP
ENSG00000101134.7	DOK5	7.39755e-07	1.50044	UP
ENSG00000248921.1	RP11-774G5.1	7.40238e-07	59.6272	UP
ENSG00000135111.10	TBX3	7.45986e-07	1.89328	UP
ENSG00000185479.5	KRT6B	7.54046e-07	3.30433	UP
ENSG00000137962.8	ARHGAP29	7.59878e-07	1.59826	UP
ENSG00000249797.1	CTD-3179P9.1	7.63677e-07	2.18305	UP
ENSG00000259023.2	LINC00524	7.88291e-07	7.27902	UP
ENSG00000168938.5	PPIC	8.04916e-07	1.49541	UP
ENSG00000157851.12	DPYSL5	8.09831e-07	-1.88935	DOWN
ENSG00000066185.8	ZMYND12	8.16536e-07	1.70438	UP
ENSG00000164675.6	IQUB	8.21904e-07	2.3704	UP
ENSG00000198759.7	EGFL6	8.23642e-07	2.77189	UP
ENSG00000163362.6	C1ORF106	8.24261e-07	-3.58041	DOWN
ENSG00000166575.12	TMEM135	8.24476e-07	1.31968	UP
ENSG00000254919.1	RP11-698N11.2	8.38891e-07	-5.88424	DOWN
ENSG00000081138.9	CDH7	8.59162e-07	2.71569	UP
ENSG00000159625.10	CCDC135	8.60916e-07	2.43858	UP
ENSG00000165655.14	ZNF503	8.65426e-07	1.38735	UP
ENSG00000267547.1	RP11-686D22.4	8.92101e-07	1.78141	UP
ENSG00000258894.1	RP11-557C9.1	8.94964e-07	15.5288	UP
ENSG00000256195.2	RP11-64D24.4	8.96052e-07	4.42262	UP
ENSG00000236202.1	GRM7-AS1	9.2078e-07	3.07232	UP
ENSG00000125888.10	BANF2	9.30535e-07	4.35475	UP
ENSG00000179588.4	ZFPM1	9.43171e-07	1.42717	UP
ENSG00000182809.6	CRIP2	9.62024e-07	1.18636	UP
ENSG00000206150.3	RNASE13	9.70247e-07	3.49787	UP
ENSG00000243667.2	WDR92	9.94083e-07	1.29207	UP
ENSG00000177133.6	LINC00982	1.07262e-06	2.33512	UP
ENSG00000162627.12	SNX7	1.10616e-06	-1.19531	DOWN
ENSG00000175785.8	PRIMA1	1.11213e-06	-3.04049	DOWN
ENSG00000242387.1	HIST1H2APS2	1.12379e-06	23.6035	UP
ENSG00000261672.1	RP11-475B2.1	1.12581e-06	9.61252	UP
ENSG00000081923.6	ATP8B1	1.12628e-06	1.87016	UP
ENSG00000205129.4	C4ORF47	1.12713e-06	1.61888	UP
ENSG00000138400.8	MDH1B	1.1538e-06	1.5501	UP
ENSG00000267159.1	AC005391.2	1.15413e-06	2.9158	UP
ENSG00000169184.5	MN1	1.1542e-06	1.61205	UP
ENSG00000237529.1	RP11-439K3.3	1.15476e-06	2.35855	UP
ENSG00000267506.1	RP11-13K12.1	1.15823e-06	2.79279	UP
ENSG00000106128.14	GHRHR	1.15987e-06	2.12963	UP
ENSG00000226741.1	CTA-929C8.6	1.16568e-06	5.61352	UP
ENSG00000123496.3	IL13RA2	1.17853e-06	2.07969	UP
ENSG00000101265.11	RASSF2	1.18283e-06	-1.39193	DOWN
ENSG00000267259.1	CTD-2008P7.9	1.21464e-06	9.80282	UP
ENSG00000258803.1	RP11-624J12.1	1.22068e-06	5.98003	UP
ENSG00000154760.9	SLFN13	1.22281e-06	1.99064	UP
ENSG00000232492.1	NPM1P13	1.2516e-06	7.18407	UP
ENSG00000234692.1	RP11-445L6.3	1.25247e-06	4.49264	UP
ENSG00000173535.9	TNFRSF10C	1.26005e-06	1.70074	UP
ENSG00000250775.1	RP11-12K22.1	1.26106e-06	12.7909	UP
ENSG00000204666.3	CTD-2126E3.1	1.26351e-06	2.07048	UP
ENSG00000033327.8	GAB2	1.26751e-06	-1.23318	DOWN
ENSG00000252835.1	SCARNA21	1.27248e-06	2.23758	UP
ENSG00000266930.2	CTD-2085J24.4	1.30202e-06	1.22966	UP
ENSG00000120925.9	RNF170	1.3129e-06	1.20836	UP
ENSG00000163536.8	SERPINI1	1.31505e-06	1.56056	UP
ENSG00000179219.5	LINC00311	1.32531e-06	3.84701	UP
ENSG00000230714.1	RP11-152L7.1	1.32671e-06	51.6245	UP
ENSG00000166173.9	LARP6	1.3275e-06	-1.24485	DOWN
ENSG00000196361.5	ELAVL3	1.34989e-06	-2.20461	DOWN
ENSG00000169126.11	ARMC4	1.36595e-06	2.58222	UP
ENSG00000181449.2	SOX2	1.3674e-06	-1.35824	DOWN
ENSG00000256061.3	DYX1C1	1.3687e-06	1.84476	UP
ENSG00000182197.6	EXT1	1.37397e-06	1.24981	UP
ENSG00000158769.13	F11R	1.37594e-06	1.45134	UP
ENSG00000221988.8	PPT2	1.42048e-06	1.19362	UP
ENSG00000136193.12	SCRN1	1.45249e-06	-1.22306	DOWN
ENSG00000164972.8	C9ORF24	1.45434e-06	2.36319	UP
ENSG00000106605.6	BLVRA	1.45548e-06	-1.1448	DOWN
ENSG00000201033.1	RNU1-96P	1.45623e-06	19.8559	UP
ENSG00000249312.1	ARL2BPP4	1.45746e-06	39.4507	UP
ENSG00000117595.6	IRF6	1.46229e-06	2.55355	UP
ENSG00000170209.4	ANKK1	1.46585e-06	3.17955	UP
ENSG00000269190.1	FBXO17	1.4665e-06	-1.60743	DOWN
ENSG00000065717.10	TLE2	1.51695e-06	1.58943	UP
ENSG00000265126.1	CTB-187M2.2	1.53345e-06	4.37157	UP
ENSG00000200756.1	RNU6-236P	1.53525e-06	6.98479	UP
ENSG00000163815.5	CLEC3B	1.57168e-06	1.68923	UP
ENSG00000105664.6	COMP	1.58427e-06	4.2416	UP
ENSG00000184524.5	CEND1	1.61601e-06	-1.52725	DOWN
ENSG00000260916.1	CCPG1	1.62339e-06	1.37783	UP
ENSG00000265359.1	RP5-1110E20.1	1.63696e-06	5.92878	UP
ENSG00000182132.8	KCNIP1	1.64981e-06	-1.89121	DOWN
ENSG00000198729.4	PPP1R14C	1.65433e-06	-1.85602	DOWN
ENSG00000233485.1	RP3-467K16.2	1.68276e-06	6.91468	UP
ENSG00000267780.1	RP11-154H12.3	1.68738e-06	4.41316	UP
ENSG00000261625.1	RP11-554A11.4	1.6995e-06	2.46063	UP
ENSG00000267009.2	RP11-120M18.2	1.70449e-06	2.02318	UP
ENSG00000187556.6	NANOS3	1.70605e-06	-1.6674	DOWN
ENSG00000241846.1	RP11-318G8.1	1.71485e-06	63.7014	UP
ENSG00000258202.1	RP11-776A13.2	1.73238e-06	11.5909	UP
ENSG00000231599.1	LINC01037	1.7479e-06	3.3559	UP
ENSG00000183695.2	MRGPRX2	1.76932e-06	8.6235	UP
ENSG00000251252.1	MTND2P31	1.82176e-06	8.07174	UP
ENSG00000135931.13	ARMC9	1.83794e-06	1.29893	UP
ENSG00000141314.8	RHBDL3	1.85523e-06	-2.46197	DOWN
ENSG00000227240.1	RP11-563D10.1	1.85793e-06	6.04859	UP
ENSG00000119699.3	TGFB3	1.87895e-06	1.36055	UP
ENSG00000255504.1	RP11-788M5.3	1.89745e-06	4.76107	UP
ENSG00000265783.1	AP000445.3	1.89894e-06	52.2673	UP
ENSG00000174844.10	DNAH12	1.9006e-06	3.04839	UP
ENSG00000186493.7	C5ORF38	1.90523e-06	-3.63108	DOWN
ENSG00000228839.1	RP3-400N23.6	2.04402e-06	1.70798	UP
ENSG00000232286.1	RP11-80K6.2	2.05489e-06	16.6039	UP
ENSG00000236807.1	AC092066.6	2.0628e-06	16.0496	UP
ENSG00000104047.10	DTWD1	2.06318e-06	1.33281	UP
ENSG00000174032.12	SLC25A30	2.06824e-06	1.35585	UP
ENSG00000132016.7	C19ORF57	2.09902e-06	-1.62061	DOWN
ENSG00000226317.2	LINC00351	2.13644e-06	12.3795	UP
ENSG00000203652.3	AC099048.1	2.18473e-06	6.73009	UP
ENSG00000180176.10	TH	2.19916e-06	4.20964	UP
ENSG00000229459.1	AC023669.1	2.20005e-06	7.19714	UP
ENSG00000162706.8	CADM3	2.21169e-06	-2.25895	DOWN
ENSG00000226309.1	SMARCE1P2	2.21182e-06	4.95997	UP
ENSG00000267223.1	AC005597.1	2.21523e-06	5.69739	UP
ENSG00000181790.6	BAI1	2.21645e-06	-1.84897	DOWN
ENSG00000262686.1	AC005356.1	2.22345e-06	1.61127	UP
ENSG00000196944.3	OR2T4	2.23173e-06	6.28507	UP
ENSG00000251073.1	NUDT19P5	2.25014e-06	3.86584	UP
ENSG00000204866.4	IGFL2	2.25075e-06	3.97646	UP
ENSG00000205022.5	PABPN1L	2.25119e-06	3.56785	UP
ENSG00000166262.11	FAM227B	2.25423e-06	1.44954	UP
ENSG00000272479.1	RP11-301G7.1	2.26211e-06	3.30014	UP
ENSG00000267364.1	RP11-47L3.1	2.2729e-06	1.86514	UP
ENSG00000105767.2	CADM4	2.31226e-06	-1.22786	DOWN
ENSG00000163492.9	CCDC141	2.31379e-06	2.4825	UP
ENSG00000102178.8	UBL4A	2.32464e-06	-1.11723	DOWN
ENSG00000188042.5	ARL4C	2.32605e-06	-1.49959	DOWN
ENSG00000072832.10	CRMP1	2.33056e-06	-1.34444	DOWN
ENSG00000139567.8	ACVRL1	2.34048e-06	1.35956	UP
ENSG00000184347.10	SLIT3	2.34178e-06	2.0605	UP
ENSG00000262003.1	RP11-676J12.7	2.35732e-06	3.24403	UP
ENSG00000238827.1	AC093611.1	2.38565e-06	15.2276	UP
ENSG00000226296.1	RP11-71J2.1	2.38707e-06	89.2035	UP
ENSG00000116678.14	LEPR	2.4643e-06	1.65933	UP
ENSG00000163394.5	CCKAR	2.4728e-06	4.83963	UP
ENSG00000107736.15	CDH23	2.48275e-06	1.82319	UP
ENSG00000135919.8	SERPINE2	2.49674e-06	-1.43541	DOWN
ENSG00000153012.7	LGI2	2.49754e-06	1.76632	UP
ENSG00000152582.8	SPEF2	2.53485e-06	1.83941	UP
ENSG00000102385.8	DRP2	2.63442e-06	-2.78761	DOWN
ENSG00000163071.6	SPATA18	2.64132e-06	2.01447	UP
ENSG00000203499.6	FAM83H-AS1	2.67605e-06	3.55606	UP
ENSG00000255509.2	RP11-445F12.1	2.67659e-06	5.00786	UP
ENSG00000019144.12	PHLDB1	2.68965e-06	-1.42279	DOWN
ENSG00000213316.5	LTC4S	2.69256e-06	2.55243	UP
ENSG00000134824.9	FADS2	2.70146e-06	-1.39161	DOWN
ENSG00000263832.1	AC023237.1	2.70617e-06	7.45578	UP
ENSG00000150556.12	LYPD6B	2.84005e-06	3.47889	UP
ENSG00000169991.6	IFFO2	2.84101e-06	-1.37524	DOWN
ENSG00000110400.6	PVRL1	2.85219e-06	1.43847	UP
ENSG00000136002.12	ARHGEF4	2.85266e-06	-1.62164	DOWN
ENSG00000249311.3	TERF1P3	2.86455e-06	6.82887	UP
ENSG00000150051.9	MKX	2.88487e-06	3.0434	UP
ENSG00000114993.11	RTKN	2.93486e-06	-1.37938	DOWN
ENSG00000235280.2	MCF2L-AS1	2.96334e-06	-2.44336	DOWN
ENSG00000242808.3	SOX2-OT	2.97657e-06	-1.50443	DOWN
ENSG00000272191.1	RP11-445F12.2	2.98506e-06	11.5	UP
ENSG00000144867.7	SRPRB	3.0158e-06	1.13263	UP
ENSG00000119403.9	PHF19	3.01918e-06	-1.26025	DOWN
ENSG00000242285.1	RPL6P8	3.01964e-06	4.62767	UP
ENSG00000235984.1	GPC5-AS1	3.02286e-06	5.26786	UP
ENSG00000128268.11	MGAT3	3.05477e-06	-1.53474	DOWN
ENSG00000168530.11	MYL1	3.22784e-06	7.70893	UP
ENSG00000265569.1	AC011453.1	3.24048e-06	47.7263	UP
ENSG00000253571.1	RP11-728L1.1	3.2494e-06	4.74179	UP
ENSG00000081913.9	PHLPP1	3.26301e-06	-1.37533	DOWN
ENSG00000180549.7	FUT7	3.28783e-06	2.36006	UP
ENSG00000074800.9	ENO1	3.29884e-06	-1.11854	DOWN
ENSG00000221890.2	NPTXR	3.32849e-06	-1.50999	DOWN
ENSG00000175658.3	DRD5P2	3.33018e-06	4.22144	UP
ENSG00000170525.14	PFKFB3	3.43163e-06	-1.29897	DOWN
ENSG00000108381.6	ASPA	3.50322e-06	2.16079	UP
ENSG00000229720.1	RP3-495K2.2	3.50397e-06	5.23706	UP
ENSG00000221968.4	FADS3	3.52915e-06	-1.34658	DOWN
ENSG00000087116.9	ADAMTS2	3.55607e-06	1.84186	UP
ENSG00000226321.3	AC104809.3	3.55963e-06	3.91058	UP
ENSG00000266981.1	RP11-799D4.2	3.56475e-06	58.5534	UP
ENSG00000100968.9	NFATC4	3.64636e-06	1.45175	UP
ENSG00000175130.6	MARCKSL1	3.80314e-06	-1.202	DOWN
ENSG00000253956.1	RP11-211F2.1	3.81883e-06	15.6284	UP
ENSG00000135314.8	KHDC1	3.82544e-06	-1.57215	DOWN
ENSG00000251361.1	CTD-2091N23.1	3.87571e-06	2.94655	UP
ENSG00000250522.1	AC004066.3	3.88442e-06	4.16866	UP
ENSG00000163624.5	CDS1	3.91139e-06	2.00154	UP
ENSG00000196352.9	CD55	3.92127e-06	1.41909	UP
ENSG00000118495.14	PLAGL1	3.9214e-06	1.79162	UP
ENSG00000272386.1	RP11-666A8.12	3.93607e-06	2.38452	UP
ENSG00000249091.1	RP11-733C7.1	3.93903e-06	5.15752	UP
ENSG00000269009.1	SLC6A21P	3.95426e-06	4.34828	UP
ENSG00000240107.1	RP11-628J14.1	4.00816e-06	9.0847	UP
ENSG00000177614.5	PGBD5	4.02157e-06	-1.54857	DOWN
ENSG00000230873.4	STMND1	4.02674e-06	5.08855	UP
ENSG00000204934.6	ATP6V0E2-AS1	4.11083e-06	-1.44791	DOWN
ENSG00000253368.3	TRNP1	4.1893e-06	-1.92613	DOWN
ENSG00000153923.6	CLCA3P	4.19215e-06	4.02808	UP
ENSG00000125285.4	SOX21	4.27969e-06	-2.16043	DOWN
ENSG00000254871.1	RP11-702F3.2	4.29869e-06	10.424	UP
ENSG00000142661.14	MYOM3	4.30051e-06	3.72923	UP
ENSG00000164035.5	EMCN	4.32156e-06	1.46555	UP
ENSG00000261478.1	RP11-429B14.4	4.33459e-06	-4.02862	DOWN
ENSG00000140939.10	NOL3	4.35805e-06	-1.361	DOWN
ENSG00000132517.10	SLC52A1	4.3685e-06	2.54715	UP
ENSG00000178342.4	KCNG2	4.46054e-06	2.40115	UP
ENSG00000261280.2	CTD-3105H18.13	4.49477e-06	1.60282	UP
ENSG00000235083.1	RP11-669M2.2	4.52523e-06	10.9364	UP
ENSG00000254653.1	RP11-702F3.1	4.57726e-06	5.04612	UP
ENSG00000162998.4	FRZB	4.60223e-06	1.51396	UP
ENSG00000252030.1	RNU6-1196P	4.61476e-06	6.36304	UP
ENSG00000146233.3	CYP39A1	4.69213e-06	1.76808	UP
ENSG00000132692.14	BCAN	4.70405e-06	-1.69142	DOWN
ENSG00000084731.9	KIF3C	4.72941e-06	-1.29181	DOWN
ENSG00000202103.1	RNU4-12P	4.73211e-06	33.0956	UP
ENSG00000157578.9	LCA5L	4.73254e-06	1.99088	UP
ENSG00000127083.7	OMD	4.73316e-06	2.78232	UP
ENSG00000075945.8	KIFAP3	4.78488e-06	1.15298	UP
ENSG00000258806.1	OR11H7	4.80055e-06	2.83018	UP
ENSG00000136490.4	LIMD2	4.80412e-06	-1.31561	DOWN
ENSG00000169668.7	BCRP2	4.87885e-06	4.2132	UP
ENSG00000100997.14	ABHD12	4.91666e-06	-1.1711	DOWN
ENSG00000164751.10	PEX2	4.94164e-06	1.15715	UP
ENSG00000183643.2	C15ORF32	4.96888e-06	4.20829	UP
ENSG00000232667.5	AC004862.6	4.98044e-06	4.93836	UP
ENSG00000087460.19	GNAS	5.00106e-06	1.09686	UP
ENSG00000228740.2	AC136896.1	5.01298e-06	7.68585	UP
ENSG00000164638.6	SLC29A4	5.05892e-06	-1.6659	DOWN
ENSG00000164900.4	GBX1	5.06418e-06	3.05754	UP
ENSG00000131080.10	EDA2R	5.06673e-06	1.86763	UP
ENSG00000229896.2	RP11-456H18.2	5.09623e-06	3.91832	UP
ENSG00000111424.6	VDR	5.21663e-06	2.34732	UP
ENSG00000237159.1	CNTFR-AS1	5.26987e-06	2.32359	UP
ENSG00000137473.13	TTC29	5.39224e-06	3.25132	UP
ENSG00000198342.5	ZNF442	5.46532e-06	1.41841	UP
ENSG00000077274.7	CAPN6	5.51368e-06	4.72036	UP
ENSG00000266207.1	AL583784.1	5.63097e-06	9.25631	UP
ENSG00000149260.10	CAPN5	5.70331e-06	-1.34627	DOWN
ENSG00000148219.12	ASTN2	5.7332e-06	-1.65598	DOWN
ENSG00000163751.3	CPA3	5.7381e-06	4.23338	UP
ENSG00000132329.6	RAMP1	5.77334e-06	-1.60022	DOWN
ENSG00000166888.6	STAT6	5.79846e-06	1.31862	UP
ENSG00000251027.1	CTC-254B4.1	5.80397e-06	5.75139	UP
ENSG00000147202.13	DIAPH2	5.82707e-06	1.36679	UP
ENSG00000113721.9	PDGFRB	5.82915e-06	1.29401	UP
ENSG00000169436.12	COL22A1	5.86718e-06	-2.20414	DOWN
ENSG00000162430.12	SEPN1	5.89734e-06	-1.20895	DOWN
ENSG00000256824.1	RP11-21A7A.2	5.90633e-06	2.13457	UP
ENSG00000111837.7	MAK	5.91075e-06	2.06237	UP
ENSG00000257842.1	NOVA1-AS1	5.91574e-06	-3.92728	DOWN
ENSG00000234306.1	RP11-271F18.1	5.91918e-06	24.2873	UP
ENSG00000174059.12	CD34	5.94133e-06	1.32782	UP
ENSG00000129295.4	LRRC6	6.01014e-06	1.48142	UP
ENSG00000186367.5	KIAA1024L	6.06834e-06	5.6469	UP
ENSG00000227713.1	AC116609.1	6.07192e-06	11.1036	UP
ENSG00000173599.9	PC	6.08586e-06	-1.30187	DOWN
ENSG00000068697.6	LAPTM4A	6.10599e-06	1.11382	UP
ENSG00000231290.1	APCDD1L-AS1	6.24347e-06	2.83836	UP
ENSG00000055118.10	KCNH2	6.34303e-06	-2.0605	DOWN
ENSG00000161249.16	DMKN	6.42733e-06	3.59429	UP
ENSG00000166573.4	GALR1	6.53039e-06	-6.31045	DOWN
ENSG00000127324.4	TSPAN8	6.67452e-06	3.08688	UP
ENSG00000269753.1	AL589739.1	6.71696e-06	2.46396	UP
ENSG00000270394.1	MTRNR2L13	6.73095e-06	15.356	UP
ENSG00000145390.7	USP53	6.80609e-06	1.57517	UP
ENSG00000178636.4	RP11-455G16.1	6.85161e-06	2.78119	UP
ENSG00000119523.8	ALG2	6.89349e-06	1.15343	UP
ENSG00000196954.8	CASP4	6.91751e-06	1.43792	UP
ENSG00000267505.1	CTC-296K1.3	6.92236e-06	2.30025	UP
ENSG00000179256.2	SMCO3	7.07327e-06	2.49565	UP
ENSG00000163462.13	TRIM46	7.07398e-06	-1.54767	DOWN
ENSG00000272760.1	RP11-5C23.1	7.08015e-06	1.46994	UP
ENSG00000261550.1	RP11-467J12.4	7.35795e-06	2.39586	UP
ENSG00000260496.2	RP11-161M6.3	7.39342e-06	2.80452	UP
ENSG00000197943.5	PLCG2	7.39638e-06	1.43342	UP
ENSG00000171862.5	PTEN	7.4018e-06	1.20495	UP
ENSG00000187068.2	C3ORF70	7.44195e-06	-1.69153	DOWN
ENSG00000171631.10	P2RY6	7.47152e-06	1.78415	UP
ENSG00000163145.8	C1QTNF7	7.51348e-06	2.31106	UP
ENSG00000196376.6	SLC35F1	7.68099e-06	-1.58182	DOWN
ENSG00000088881.16	EBF4	7.70807e-06	-1.47256	DOWN
ENSG00000223685.1	LINC00571	7.73986e-06	2.08776	UP
ENSG00000263146.2	RP11-849I19.1	7.79879e-06	-3.06071	DOWN
ENSG00000110427.10	KIAA1549L	7.80369e-06	-1.68106	DOWN
ENSG00000090097.16	PCBP4	7.80619e-06	-1.2344	DOWN
ENSG00000133640.14	LRRIQ1	7.89033e-06	3.20583	UP
ENSG00000114698.10	PLSCR4	7.96864e-06	1.38787	UP
ENSG00000161544.5	CYGB	7.97354e-06	1.81749	UP
ENSG00000146433.8	TMEM181	7.98983e-06	-1.22167	DOWN
ENSG00000010810.13	FYN	8.03387e-06	-1.18641	DOWN
ENSG00000252224.1	RNU4ATAC15P	8.05915e-06	15.3568	UP
ENSG00000253698.1	RP11-1259L22.1	8.0662e-06	8.6551	UP
ENSG00000260293.1	RP11-715J22.6	8.08827e-06	-2.40837	DOWN
ENSG00000123243.10	ITIH5	8.13693e-06	1.50374	UP
ENSG00000173227.9	SYT12	8.18895e-06	-3.45084	DOWN
ENSG00000230747.1	AC021188.4	8.24403e-06	-1.84258	DOWN
ENSG00000269891.1	ARHGAP19-SLIT1	8.33557e-06	3.33592	UP
ENSG00000162735.14	PEX19	8.37733e-06	1.08793	UP
ENSG00000165233.13	C9ORF89	8.39157e-06	-1.23706	DOWN
ENSG00000258170.1	RP11-263K4.5	8.41038e-06	4.87952	UP
ENSG00000096872.11	IFT74	8.4405e-06	1.31296	UP
ENSG00000142686.7	C1ORF216	8.50944e-06	-1.14332	DOWN
ENSG00000166780.6	C16ORF45	8.56018e-06	-1.1846	DOWN
ENSG00000106771.8	TMEM245	8.64239e-06	1.21355	UP
ENSG00000132357.9	CARD6	8.68006e-06	1.44041	UP
ENSG00000225653.1	RNF19BPY	8.68803e-06	43.8176	UP
ENSG00000105255.6	FSD1	8.69802e-06	-1.43516	DOWN
ENSG00000248927.1	CTD-2334D19.1	8.70949e-06	2.54206	UP
ENSG00000203724.6	C1ORF53	8.7169e-06	2.07028	UP
ENSG00000266479.1	CTD-2515C13.1	8.80174e-06	3.41017	UP
ENSG00000227640.2	SOX21-AS1	8.80402e-06	-2.03579	DOWN
ENSG00000178403.3	NEUROG2	8.82119e-06	4.58617	UP
ENSG00000107338.8	SHB	8.82276e-06	-1.50641	DOWN
ENSG00000174238.10	PITPNA	9.13304e-06	1.12421	UP
ENSG00000271736.1	RP11-85G21.3	9.13464e-06	8.11608	UP
ENSG00000137285.9	TUBB2B	9.3265e-06	-1.28849	DOWN
ENSG00000254192.1	CTC-558O2.2	9.32929e-06	4.83442	UP
ENSG00000165355.7	FBXO33	9.40446e-06	1.1899	UP
ENSG00000229735.1	FTLP16	9.4145e-06	16.1134	UP
ENSG00000187416.7	LHFPL3	9.43318e-06	-2.24051	DOWN
ENSG00000267466.1	RP11-13K12.5	9.55961e-06	2.34303	UP
ENSG00000230896.1	RP11-767N6.7	9.62317e-06	1.21856	UP
ENSG00000235431.1	AC006373.1	9.68519e-06	9.42251	UP
ENSG00000263588.1	RP11-595B24.2	9.69063e-06	13.2966	UP
ENSG00000198892.6	SHISA4	9.69109e-06	-1.23864	DOWN
ENSG00000164434.7	FABP7	9.69231e-06	-1.45014	DOWN
ENSG00000172340.10	SUCLG2	9.69879e-06	1.15399	UP
ENSG00000167693.12	NXN	9.71011e-06	1.36928	UP
ENSG00000248995.2	RP11-766N7.4	9.91034e-06	3.90206	UP
