# Supplementary material for: PATZ1 fusions define a novel molecularly distinct neuroepithelial tumor entity with a broad histological spectrum
Source: Acta Neuropathol. 2021 Aug 21;142(5):841–57. doi: 10.1007/s00401-021-02354-8 (PMC8500868; doi:10.1007/s00401-021-02354-8)
Supplement: Supplementary file 7 — Supplementary file7. Supplementary Fig. 5 a Heatmap of the primary drug screen conducted on the KS-1 cell line. Drugs are ordered according to the drug specific sensitivity score (DSS) of the KS-1 cells. Area under the curve for drug efficacy (AUC) and IC50 values are also shown. Five potentially interesting candidate hits were selected based on high DSS and superior efficacy in KS-1 compared with astrocytes. b The five candidate hits were tested again on the KS-1 cells with a greater range of concentrations to confirm efficacy and obtain a more precise IC50 value. X indicates that the IC50 value measured for fetal astrocytes is higher than the highest concentration of drug applied (drug cytotoxic effect was not completely reached)(XLSX 9176 kb) [file 401_2021_2354_MOESM7_ESM.xlsx]

## Sheet: NET-PATZ1 (60)
Unique_index	Histopathologic_diagnosis	Location	Age (Years)	Sex	Primary.or.recurrence	Age.at.initial.Dx	Progression.Y/N	PFS.from.primary.DX.(months)	Death.Yes/No	OS.from.initial.Dx.(months)	Treatment	WES/PanelNDSequencing	RNA-seq	CNV 22_DNA_Methyl_CNV	1p	1q	2p	2q	3p	3q	4p	4q	5p	5q	6p	6q	7p	7q	8p	8q	9p	9q	10p	10q	11p	11q	12p	12q	13	14	15	16p	16q	17p	17q	18p	18q	19p	19q
1	Cortical dysplasia	right occipital	17	m	Primary	17	0	24	0	24	W&W	ND	ND	subtotal loss	0	0	0	0	0	0	0	0	0	0	0	0	0	0	0	0	0	0	0	0	0	0	0	0	0	0	0	0	0	0	0	-1	-1	0	0
3	Malignant spindle cell neoplasm	left frontal lobe	16	m	Recurrence	11	1	36	1	72	Radiation	ND	ND	subtotal loss	-1	1	0	0	0	0	-1	-1	0	0	0	-1	0	0	0	-1	-1	-1	0	0	0	0	-1	0	0	0	-1	0	0	0	0	0	0	0	0
4	Pleomorphic xanthoastrocytoma	left parietofrontal	7	f	Primary	6.5	0	96	0	96	Surgery only, first STR then GTR, since then disease free	ND	EWSR1:PATZ1	focal losses	0	0	0	0	0	0	0	0	0	0	0	0	0	0	0	0	0	0	-1	0	0	0	-1	0	0	0	0	0	0	0	-1	0	0	0	0
6	Anaplastic astrocytoma WHO grade 3 // glioblastoma WHO grade 4	right parietoccipital	11	f	Primary	11	0	50	0	50	HIT-HGG_2007/HIT-GBM-D	Panel	MN1:PATZ1	focal losses	0	0	0	0	0	0	0	0	0	0	0	0	0	0	0	0	0	0	0	0	0	0	0	0	0	0	0	0	0	0	0	0	0	0	0
8	Malignant neuroepihelial tumor	right frontal	10	m	Primary	10	N/A	N/A	N/A	N/A	Unknown	ND	ND	focal loss	0	0	0	0	0	0	0	0	0	0	0	0	0	0	0	0	0	0	0	0	0	0	0	0	0	0	0	0	0	0	0	0	0	0	0
9	Glioneuronal tumor	left parietal	9	f	Primary	9	0	12	0	12	Unknown	ND	ND	loss	0	0	0	0	0	0	0	0	0	0	0	0	0	0	0	0	0	-1	0	0	0	0	0	0	0	0	0	0	0	-1	0	0	0	0	0
10	Glioblastoma WHO grade 4	supratentorial, frontal lobe	7	f	N/A	N/A	N/A	N/A	N/A	N/A	Unknown	Panel	ND	subtotal loss	0	0	0	0	0	0	0	0	0	0	-1	-1	1	1	0	0	0	0	0	0	0	0	0	0	1	-1	1	0	0	0	0	-1	-1	0	0
11	Neuroepithelial tumor	supratentorial, sulcus centralis	27	m	N/A	N/A	N/A	N/A	N/A	N/A	Unknown	ND	ND	focal losses	-1	0	1	1	0	0	0	0	1	1	0	0	1	1	0	0	1	0	0	0	-1	-1	0	0	0	0	1	0	0	0	0	-1	-1	1	1
12	Anaplastic ependymoma WHO grade 3	supratentorial, left parietal	2	f	N/A	N/A	N/A	N/A	N/A	N/A	Unknown	ND	ND	Chromothripsis	0	0	0	0	0	0	0	0	0	0	0	0	0	0	0	0	0	0	0	0	0	0	0	0	0	0	0	0	0	0	0	0	0	0	0
13	N/A	supratentorial, suprasellar, suprachiasmatic	39	f	N/A	N/A	N/A	N/A	N/A	N/A	Unknown	ND	ND	subtotal loss	0	0	0	0	0	0	0	0	0	0	0	0	0	0	0	0	0	0	0	0	0	0	0	0	0	0	0	0	0	-1	0	0	0	CTx	CTx
14	Malignant neuroepihelial tumor	left parietal	2	m	Primary	2	0	26	0	26	GTR -Surgery+ CHT EU-Rhab: 3 x 3 ICE (Ifosfamide, Carboplatin, Etoposide), Doxorubicin, VCA (Vincristine, Cyclophosphamide, Act-D), local 59.4 Gy RTUnknown	Panel	MN1:PATZ1	Chromothripsis	-1	0	0	0	0	0	0	0	0	0	0	0	0	0	0	0	0	0	0	1	0	0	0	0	0	0	0	0	0	1	-1	0	0	0	0
15	Ependymoma WHO grade 3	N/A	N/A	m	N/A	N/A	N/A	N/A	N/A	N/A	Unknown	ND	ND	Chromothripsis	0	0	0	0	0	0	0	0	0	0	0	0	0	0	0	0	0	0	0	0	0	0	0	0	0	0	0	0	0	0	0	0	0	0	0
16	Primitive neuroepithelial tumor	right cerebral hemisphere (Termporal-Parietal-Occipital lobe)	5	m	Primary	5	0	144	0	144	GTR & 50,4 gy RT - no CT	ND	ND	Chromothripsis	-1	1	0	0	0	0	0	0	0	0	0	0	-1	-1	0	0	0	0	0	0	0	0	0	0	1	1	0	-1	-1	1	1	0	0	1	1
17	Anaplastic astrocytoma WHO grade 3	supratentorial, right occipital	2	f	Primary	2	N/A	N/A	N/A	N/A	Unknown	Panel	ND	Chromothripsis	0	0	0	0	0	0	0	0	0	0	0	0	0	0	0	0	0	0	0	0	0	0	0	0	0	0	0	0	0	0	0	0	0	0	0
18	Glioneuronal tumor	left parietooccipital	17	m	Primary	17	0	40	0	40	GTR- Radiotherapy 60 Gy + temozolomide 75 mg/m2/day; then Temozolomide 260 mg/day for 5 days/month for 1 year	ND	ND	focal losses	-1	1	0	0	0	0	0	0	0	0	0	0	0	0	0	0	-1	-1	0	0	-1	-1	0	0	0	0	0	0	0	0	0	0	0	0	0
19	Low-grade glioneuronal tumor	cerebellar	7	f	Primary	7	0	36	0	36	STR- Surgery only	ND	ND	Chromothripsis	0	0	0	0	0	0	0	0	0	0	0	0	0	0	-1	-1	0	0	0	0	0	0	0	0	0	0	0	0	0	0	0	0	0	0	0
21	Low-grade glioneuronal tumor	left lateral ventricle	32	f	Primary	32	0	44	0	44	GTR- Surgery only	ND	EWSR1:PATZ1	subtotal loss	0	0	0	0	0	0	0	0	0	0	0	0	0	0	0	0	0	0	CTx	0	0	0	0	0	0	0	0	0	0	0	0	0	0	0	0
22	Glioblastoma WHO grade 4	left temporo-occipital	3	m	Primary	3	0	18	0	18	SJ18 8 cycles; ICE 3 cycles; RT 59Unknown4Gy	Panel	MN1:PATZ1	subtotal loss	0	0	0	0	0	0	0	0	0	0	0	0	0	0	0	0	0	0	0	0	0	0	0	0	0	0	0	0	0	0	0	-1	-1	0	0
23	Gliosarcoma WHO grade 4	left parietal	43	m	Primary	43	0	136	0	136	GTR Surgery, TMZ 24 cycles, RT	ND	ND	Chromothripsis	-1	1	0	0	0	0	0	0	0	0	0	0	0	0	0	0	-1	-1	0	0	0	0	0	0	-1	0	-1	0	-1	0	0	-1	-1	0	0
24	Low-grade glial/glioneuronal tumor	supratentorial, left occipital	16	f	Primary	16	1	14	0	23.5	W&W 11 Months, then surgery-GTR	Panel	EWSR1:PATZ1	Chromothripsis	0	0	0	0	0	0	0	0	0	0	0	0	0	0	0	0	0	0	0	0	0	0	0	0	0	0	0	0	0	0	0	0	0	0	0
25	Malignant neuroepihelial tumor	left periventricular	6	f	Primary	6	N/A	N/A	0	27	Radio-/Chemotherapy	Panel	EWSR1:PATZ1	subtotal loss	0	0	0	0	0	0	0	0	0	0	0	0	0	0	0	0	0	0	0	0	0	0	0	0	0	0	0	0	0	0	0	-1	-1	0	0
26	High-grade glioma	cerebellum	11	f	Recurrence	N/A	N/A	N/A	N/A	N/A	Unknown	WES	EWSR1:PATZ1	Chromothripsis	-1	0	0	0	0	0	0	0	1	1	0	0	0	0	0	0	0	0	0	0	0	0	0	0	0	0	0	0	0	0	0	-1	-1	0	0
28	Pleomorphic xanthoastrocytoma	roof of the 2nd ventricle	19	f	Recurrence	18	1	5	0	14	Unknown	WES	MN1:PATZ1	subtotal loss	0	0	0	0	0	0	0	0	0	0	0	0	0	0	0	0	0	0	0	0	0	0	0	0	0	1	0	0	0	0	-1	0	0	0	0
29	Pleomorphic xanthoastrocytoma	N/A	N/A	m	N/A	N/A	N/A	N/A	N/A	N/A	Unknown	ND	ND	Chromothripsis	0	0	0	0	0	0	0	0	0	0	0	0	0	0	0	0	0	0	0	0	0	0	0	0	0	0	0	0	0	0	0	0	0	0	0
30	High-grade glioma	Spinal (T8)	9	m	Relapse (Metastasis)	5	1	12	0	69	Vinc/Carbo->TMZ; RT 59Unknown4Gy + TMZ at 1st relapse; re-RT + Bev/Iri at 2nd relapse	WES	MN1:PATZ1	focal losses	-1	1	0	0	1	1	0	0	0	1	0	-1	0	0	1	1	0	0	0	0	-1	0	0	0	0	0	1	0	0	0	0	-1	-1	0	0
31	Glioma	N/A	2	f	N/A	N/A	N/A	N/A	N/A	N/A	Unknown	ND	ND	Chromothripsis	0	0	0	0	0	0	0	0	0	0	0	0	0	0	0	0	0	0	0	0	0	0	0	0	0	0	0	0	0	0	0	0	0	0	0
33	Glioblastoma WHO grade 4	hemispheric	12	m	Primary	12	N/A	N/A	0	143.3	Unknown	ND	ND	focal losses	0	0	0	0	0	0	0	0	0	0	0	0	0	0	0	0	0	0	0	0	0	0	0	0	0	0	0	0	0	0	0	0	0	0	0
34	Pleomorphic xanthoastrocytoma	left frontotemporal	11	m	N/A	N/A	N/A	N/A	N/A	N/A	Unknown	ND	ND	Chromothripsis	0	1	0	0	0	0	0	0	0	0	0	-1	0	0	0	0	0	0	0	0	0	0	0	0	0	0	0	0	0	0	0	-1	-1	0	0
35	Glioma	left parietotemporal	28	m	N/A	N/A	N/A	N/A	N/A	N/A	Unknown	ND	ND	Chromothripsis	0	1	1	1	0	0	0	0	0	0	0	0	0	0	1	1	0	0	0	0	0	0	1	1	1	1	0	0	0	0	0	1	-1	0	0
36	Glioma	spinal, intramedullary (C1-3)	43	f	N/A	N/A	N/A	N/A	N/A	N/A	Unknown	ND	ND	none	0	0	0	0	0	0	0	0	0	0	0	0	0	0	0	0	0	0	0	0	0	0	0	0	0	0	0	0	0	0	0	0	0	0	0
37	Ependymoma WHO grade 2	frontal lobe	15	f	Primary	15	0	31	0	31	Surgery-GTR	ND	EWSR1:PATZ1	Chromothripsis	0	0	0	0	0	0	0	0	0	0	0	0	0	0	0	0	0	0	0	0	-1	1	0	0	0	0	0	0	0	0	0	0	0	0	0
39	Ependymoma WHO grade 2	spinal (C2-3)	32	m	Primary	32	0	11	0	11	GTR and RT	ND	ND	Chromothripsis	0	0	1	1	0	0	0	0	1	1	0	0	1	1	0	0	1	1	-1	-1	0	0	1	1	0	0	1	0	0	0	0	-1	-1	0	0
40	Anaplastic ependymoma WHO grade 3	supratentorial, parieto-occipital left	6	m	N/A	N/A	N/A	N/A	N/A	N/A	Unknown	ND	EWSR1:PATZ1	Chromothripsis	0	0	0	0	0	0	0	0	0	0	0	0	0	0	0	0	0	0	0	0	0	0	0	0	0	0	0	0	0	0	0	0	0	CTx	CTx
41	Ependymoma	N/A	N/A	f	N/A	N/A	N/A	N/A	N/A	N/A	Unknown	ND	ND	loss	0	0	0	0	0	0	0	0	0	0	0	0	0	0	0	0	0	0	0	0	0	0	0	0	0	0	0	0	0	0	0	0	0	0	0
42	Oligodendroglioma WHO grade 2	N/A	2	m	N/A	N/A	N/A	N/A	N/A	N/A	Unknown	ND	ND	subtotal loss	0	0	0	0	0	0	0	0	0	0	0	0	0	0	0	0	0	0	0	0	0	0	0	0	0	0	0	0	0	0	0	0	0	0	0
43	Glioblastoma WHO grade 4	N/A	4	m	Primary	4	0	8	0	8	Unknown	ND	MN1:PATZ1	loss	0	-1	0	0	0	0	0	0	0	0	0	-1	0	0	0	0	0	0	-1	-1	0	0	0	0	0	0	0	-1	-1	0	0	-1	-1	0	0
45	Ependymoma	N/A	N/A	m	N/A	N/A	N/A	N/A	N/A	N/A	Unknown	ND	ND	focal losses	0	0	0	0	0	0	0	0	0	0	0	0	0	0	0	0	0	0	0	0	0	0	0	0	0	0	0	0	0	0	0	-1	0	0	0
46	High-grade glioma	supratentorial, right parietal	13	f	Recurrence	12	1	7	0	48	Photontherapy 50,4 followed by 12 cycles TMZ	Panel	MN1:PATZ1	Chromothripsis	0	0	0	0	0	0	0	0	0	0	0	0	0	0	0	0	0	0	0	0	0	0	0	0	0	0	0	0	0	0	0	0	0	0	0
47	Low-grade glioma	left parietooccipital	80	f	N/A	N/A	N/A	N/A	N/A	N/A	Unknown	ND	ND	subtotal loss	0	1	0	0	0	0	0	0	0	0	0	0	0	0	0	0	0	0	0	-1	0	0	0	0	0	0	0	0	0	0	0	0	0	0	0
48	Ependymoma WHO grade 2	posterior fossa	4	f	N/A	N/A	N/A	N/A	N/A	N/A	Unknown	ND	ND	focal loss	0	0	0	0	0	0	0	0	0	0	0	0	0	0	0	0	0	0	0	0	0	0	0	0	0	0	0	0	0	0	0	0	0	0	0
49	Low-grade glioma	parietal	N/A	m	N/A	N/A	N/A	N/A	N/A	N/A	Unknown	ND	ND	Chromothripsis	0	0	0	0	0	0	0	0	0	0	0	0	0	0	0	0	0	0	0	0	0	0	0	0	0	0	0	0	0	0	0	0	0	0	0
50	Neuroepithelial tumor	N/A	48	m	Primary	48	N/A	N/A	N/A	N/A	Unknown	ND	ND	Chromothripsis	0	0	0	0	0	0	0	0	0	0	1	-1	0	0	0	0	0	0	0	0	0	0	0	0	0	0	0	0	0	0	0	-1	-1	0	0
51	Astroblastoma	right frontal	9	m	Primary	9	0	95	0	95	Surgery-GTR	ND	ND	Chromothripsis	0	0	0	0	0	0	0	0	0	0	0	0	0	0	0	0	0	0	0	0	0	0	0	0	0	0	0	0	0	0	0	0	0	0	0
52	Malignant peripheral nerve sheath tumor	left occipital	2	f	Primary	2	0	100	0	100	Surgery-GTR, 5 X ICE, Proton therapy	ND	MN1:PATZ1	focal losses	0	0	0	0	0	0	0	0	0	0	0	0	0	0	0	0	0	0	0	0	0	0	0	0	0	0	0	0	0	0	0	0	0	0	0
53	High-grade glial/glioneuronal tumor	left frontoparietal	19	f	Recurrence	17	1	10	0	14	Initially surgery only; at relapse re-surgery + Proton RT 59.4Gy	WES	EWSR1:PATZ1	Chromothripsis	0	0	0	0	0	0	0	0	0	0	0	0	0	0	CTx	1	0	0	0	0	0	0	-1	0	0	0	CTx	0	0	0	0	0	0	CTx	0
54	Glioblastoma WHO grade 4	left parietal	19	f	N/A	N/A	N/A	N/A	N/A	N/A	Unknown	ND	ND	subtotal loss	0	0	0	0	0	0	0	0	0	0	0	0	0	0	0	0	0	0	0	0	0	0	0	0	0	0	0	0	0	0	0	0	0	0	0
55	N/A	N/A	N/A	m	Primary	14	N/A	N/A	N/A	N/A	Unknown	Panel	MN1:PATZ1	focal losses	-1	0	0	0	0	0	0	0	0	0	-1	-1	0	0	0	0	0	0	0	0	0	0	0	0	0	0	0	0	0	0	0	0	0	0	0
56	Malignant NET with focal glial and sarcomatous differentiation	supratentorial, frontal left	39	f	Primary	39	0	116	0	116	Surgery-GTR	ND	ND	Chromothripsis	0	0	0	0	0	0	0	0	0	0	0	0	0	0	0	0	0	0	0	0	0	0	0	0	0	0	0	0	0	0	0	0	0	0	0
60	Glioblastoma WHO grade 4	left hemispheric	13.5	m	Recurrence	1	1	62	1	166	STR only in 1996; RT+TMZ at 1st relapse 2001; surgery + symptomatic therapy 2008	ND	MN1:PATZ1	Chromothripsis	0	1	0	0	0	0	0	1	0	0	0	-1	1	1	1	1	0	0	0	0	0	0	0	0	0	0	1	0	0	0	0	-1	-1	0	0
61	Glioblastoma WHO grade 4	supratentorial- Cerebrum	4	m	Primary	4	0	10	0	10	HIT-SKK then proton RT 54 Gy, Temozolomid/lomustine 3 cycles	ND	MN1:PATZ1	loss	0	0	0	0	0	0	0	0	0	0	0	0	0	0	0	0	0	0	0	0	-1	0	0	0	0	0	0	0	0	0	0	0	0	0	0
65	Subependymoma WHO grade 1	N/A	4	f	N/A	N/A	N/A	N/A	N/A	N/A	Unknown	ND	ND	focal loss	0	0	0	0	0	0	0	0	0	0	0	0	0	0	0	0	0	0	0	0	0	0	0	0	0	0	0	0	0	0	0	0	0	0	0
66	Malignant neuroepithelial tumor	hemispheric	1	f	Primary	1	0	5	0	5	PNET HR: GTR Surgery, VP16/Carbo; Thiotepa; SCT; 50Gy protons	ND	MN1:PATZ1	subtotal loss	0	0	0	0	0	0	0	0	0	0	0	0	0	0	0	0	0	0	0	0	0	0	0	0	0	0	0	0	0	0	0	0	0	0	0
67	Glioblastoma WHO grade 4	right temporo-parietal	18	m	Primary	18	0	8.5	0	8.5	TMZ; Ipilimumab; RT 60Gy	ND	ND	Poor Quality	0	0	-1	-1	0	0	0	0	0	0	0	0	0	0	0	0	-1	-1	0	0	0	0	0	0	-1	-1	0	0	0	-1	-1	0	0	0	0
68	High-grade glioma	spinal (metastasis): primary tumor in temporal lobe	13	m	Relapse (Metastasis)	8	1	36	0	84	Surgery, TMZ	ND	EWSR1:PATZ1	Chromothripsis	-1	1	0	0	0	0	0	-1	0	0	0	-1	0	0	0	0	0	0	0	-1	0	0	0	0	0	0	0	0	0	0	0	0	0	0	0
69	Glioblastoma WHO grade 4	posterior fossa	0	f	Recurrence	0	1	6	0	15	Cyclo/Etop /Carbo x 6 cycles; at relapse: Almost GTR & high dose MTX/cisplat/Cyclo x 4 cycles, then 2 cycles IV Topo/Cyclo, about to commence oral maintenance topo/cyclo)	Panel	MN1:PATZ1	Chromothripsis	0	0	0	0	0	0	0	0	0	0	0	0	0	0	0	0	0	0	0	0	0	0	0	0	0	0	0	0	0	0	0	0	0	0	0
70	Low-grade glioneuronal tumor	cerebral hemisphere	8	m	Primary	8	N/A	N/A	N/A	N/A	Unknown	ND	EWSR1:PATZ1	loss	0	0	0	0	0	0	0	0	-1	0	0	0	0	0	0	0	0	0	0	0	0	0	0	0	0	0	CTx	0	0	0	0	-1	0	0	0
71	Glioblastoma WHO grade 4	N/A	25	m	Recurrence	3	1	144	0	288	Unknown	ND	EWSR1:PATZ1	subtotal loss	0	0	0	-1	0	0	0	0	1	1	0	-1	0	0	0	0	0	0	0	0	-1	0	0	-1	-1	-1	0	0	0	0	0	0	0	0	0
72	Anaplastic ependymoma WHO grade 3	4th Ventricle	4	f	Primary	4	0	6	0	6	Proton beam therapy plus Temozolomide	ND	EWSR1:PATZ1	focal loss	0	0	0	0	0	0	0	0	0	0	0	0	0	0	0	0	0	0	0	0	0	0	0	0	0	0	0	0	0	0	0	0	0	0	0
73	Glioblastoma WHO grade 4	right frontoparietal	0.9	f	Primary	0.9	1	1	0	6	Unknown	ND	MN1:PATZ1	subtotal loss	0	0	0	0	0	0	0	0	0	0	0	0	0	0	0	0	0	0	0	0	0	0	0	0	0	0	0	0	-1	0	0	0	0	0	0
74	Low-grade glioneruonal tumor	left frontal	16	f	Primary	16	0	7	0	7	W&W then Surgery-GTR	ND	EWSR1:PATZ1	subtotal loss	0	0	0	0	0	0	0	0	0	0	0	0	0	0	0	0	0	0	0	0	0	0	0	0	0	0	0	0	0	0	0	0	0	0	0
	N/A = not applicable											RT radiotherapy, CHT chemotherapy	WES= Whole Exome Sequencing	ND= not done		0= flat CNV /small focal alterations of unknown significance			1= gain	-1= loss			CTx= Chromothripsis
												GTR- Gross total resection
												STR- subtotal resection
												W&W- watch and wait
[truncated: 3 more columns]

## Sheet: Immunohistochemistry
Unique_index	Detailed_Institional_Diagnosis	RNA_Fusion	Notes	GFAP	Olig-2	MAP2	NeuN	SYP	S100	EMA	Vimentin	CD34	NG2	Ki67
14	Malignant neuroepithelial tumor with focal glial and sarcomatous differentiation	MN1:PATZ1		++	-	+++	ND	ND	-	-	+++	-	+++	10-20%
19	Low grade glioneural tumor, probably ganglioglioma WHO grade 1	ND	Siegfried et al. (2018)- Case 2	ND	+++	ND	ND	+++	ND	ND	ND	++	ND	<3%
21	Low grade glioneuronal tumor probably glioneuronal papillary tumor	EWSR1:PATZ1	Siegfried et al. (2018)- Case 1	+++	+++	ND	ND	++	++	ND	ND	ND	ND	<3%
22	Giant cell glioblastoma WHO grade 4	MN1:PATZ1		+++	++	ND	-	ND	++	++	+++	++	ND	5-15%
23	Gliosarcoma WHO grade 4	ND		-	ND	++	ND	-	+	-	ND	vessels	+++	0.2
24	Low-grade glial/glioneuronal tumor	EWSR1:PATZ1		+++	+++	+++	+	+++	ND	ND	ND	vessels	ND	<1%
28	Pleomorphic Xanthoastrocytoma	MN1:PATZ1		+++	+++	+++	-	-	ND	ND	ND	ND	ND	0.03
30	High-grade glioma	MN1:PATZ1		+++	++	++	-	++	+++	ND		+++	+++	0.3
51	Astroblastoma	ND		+++	ND	+++	+	+	ND	ND	ND	vessels	ND	ND
52	Malignant peripheral nerve sheath tumor	MN1:PATZ1		++	-	+++	+	+	++	+	+++	+	ND	0.15
56	Malignant NET with focal glial and sarcomatous differentiation	EWSR1:PATZ1		+	-	+	-	-		+	+++	+	ND	15-40%
61	Glioblastoma WHO grade 4	MN1:PATZ1		+++	++	ND	ND	-	++		+++	ND	ND	30%
66	Malignant neuroepithelial tumor	MN1:PATZ1	Burel-Vandenbos et al. (2020)	++	++	ND	++	-		+	+++	++	ND	ND
69	Glioblastoma WHO grade 4	MN1:PATZ1	Primary tumor	++++	ND	ND	-	-	ND	-	ND	ND	ND	<40%
71	Glioblastoma WHO grade 4	EWSR1:PATZ1		+++	+++	+++	-	+	ND	ND	ND	-	+++	0.3
72	Glioblastoma WHO grade 4	MN1:PATZ1		+++	++	ND	ND	-	+++	+	ND	ND	ND	0.33
		+++	diffusely positive	+++	diffusely positive, dot-like
		++	focally positive	++	patchy, dot-like
		+	few/scattered cells	+	scattered, dot/like
		ND	not done
